# Supplementary material for: Magneto-photoelectrochemical 2D heterojunction platform for biosensing detection
Source: Research Square preprint supplement (doi:10.21203/rs.3.rs-7046681/v1), 2025-07-09
Supplement: Supplementary file 1 [file 98899664df429b5fcdac7d3e.docx]

**Supporting information for Magneto-photoelectrochemical 2D heterojunction platform for biosensing detection**

Tao Wang1#, Nan Zhang1#*, Hongjie Huang4, Yunhe An2, Yunyun Dai5, Yongrui Li1, Nan Yang2, Chaojie Yang2, Xinran Zhou2, Yucheng Zhu4, Yingshan Ma5, Lingling Huang1*, Yongtian Wang1, Yang Liu3*, Zhiyong Yan2*

1Beijing Engineering Research Center of Mixed Reality and Advanced Display, School of Optics and Photonics, Beijing Institute of Technology, Beijing, 100081, China.

2Institute of Analysis and Testing, Beijing Academy of Science and Technology (Beijing Center for Physical and Chemical Analysis), Beijing, 100089, China.

3Department of Chemistry, Kay Lab of Bioorganic Phosphorus Chemistry and Chemical Biology of Ministry of Education, Beijing Key Laboratory for Analytical Methods and Instrumentation, Tsinghua University, Beijing, 100084, China.

4Department of Sports Medicine Peking University Third Hospital, Institute of Sports Medicine of Peking University, Beijing Key Laboratory of Sports Injuries, Engineering Research Center of Sports Trauma Treatment Technology and Devices Ministry of Education, Beijing, 100191, China.

5School of Integrated Circuits and Electronics, Beijing Institute of Technology, Beijing, 100081 China.

#These authors contributed equally: Tao Wang, Nan Zhang

*Corresponding Authors e-mail: [nanzhang@bit.edu.cn;](mailto:nanzhang@bit.edu.cn;) [huanglingling@bit.edu.cn;](mailto:huanglingling@bit.edu.cn;) [liu-yang@mail.tsinghua.edu.cn;](mailto:liu-yang@mail.tsinghua.edu.cn;) [yanzhiyong@bcpca.ac.cn](mailto:yanzhiyong@bcpca.ac.cn)

**This file includes:**

Supplementary Note 1: Formulas for calculating conduction band potentials and valence band potentials

Supplementary Note 2: Computational details

Fig. S1 SEM image of the MXenes film.

Fig. S2 AFM image of the Co-TiO2 Nanosheet.

Fig. S3 EDX mapping of the elemental composition of MXenes.

Fig. S4 EDX mapping of the elemental composition of Co-TiO2.

Fig. S5 XPS spectra of MXenes powder.

Fig. S6 Preparation process of biosensor.

Fig. S7 The photocurrent response diagram corresponding to progressively modified electrodes.

Fig. S8 PL spectra of Co-TiO2 with MF and without MF conditions.

Fig. S9 The intensity of the photocurrent signal changes with different kempatide concentrations.

Fig. S10 The linear relationship between the intensity of the photocurrent changes and the PKA concentration without magnetic field.

Fig. S11 The detection of PKA concentration in the synovial fluid (diluted 500 times) of normal individuals and osteoarthritis patients using an Elisa kit.

Fig. S12 8-cycle response curve of the PEC biosensor.

Table 1 Comparison of various methods for PKA activity assay

**Supplementary Note 1: Formulas for calculating conduction band potentials and valence band potentials.**

The conversion equation normal hydrogen electrode potential (NHE) and Ag/AgCl electrode potential1：

**Supplementary Note 2: Computational details.**

All the calculations were carried out using the GGA-PBE functional implemented in the Vienna ab initio Simulation Package (VASP)2. We used the generalized gradient approximation (GGA) with the Pedrew-Burke-Ernzerhof (PBE) function3 and Hubbard U corrections (3.32 eV for treating Co 3d orbitals) were introduced to consider the self-interaction error of transition metals. The cut-off energy for plane wave is set to 500 eV. The energy criterion is set to 10-5 eV in iterative solution of the Kohn-Sham equation. The Brillouin zone integration is performed using a 3x3x1 k-mesh. All the structures are relaxed until the residual forces on the atoms have declined to less than 0.01 eV/Å.


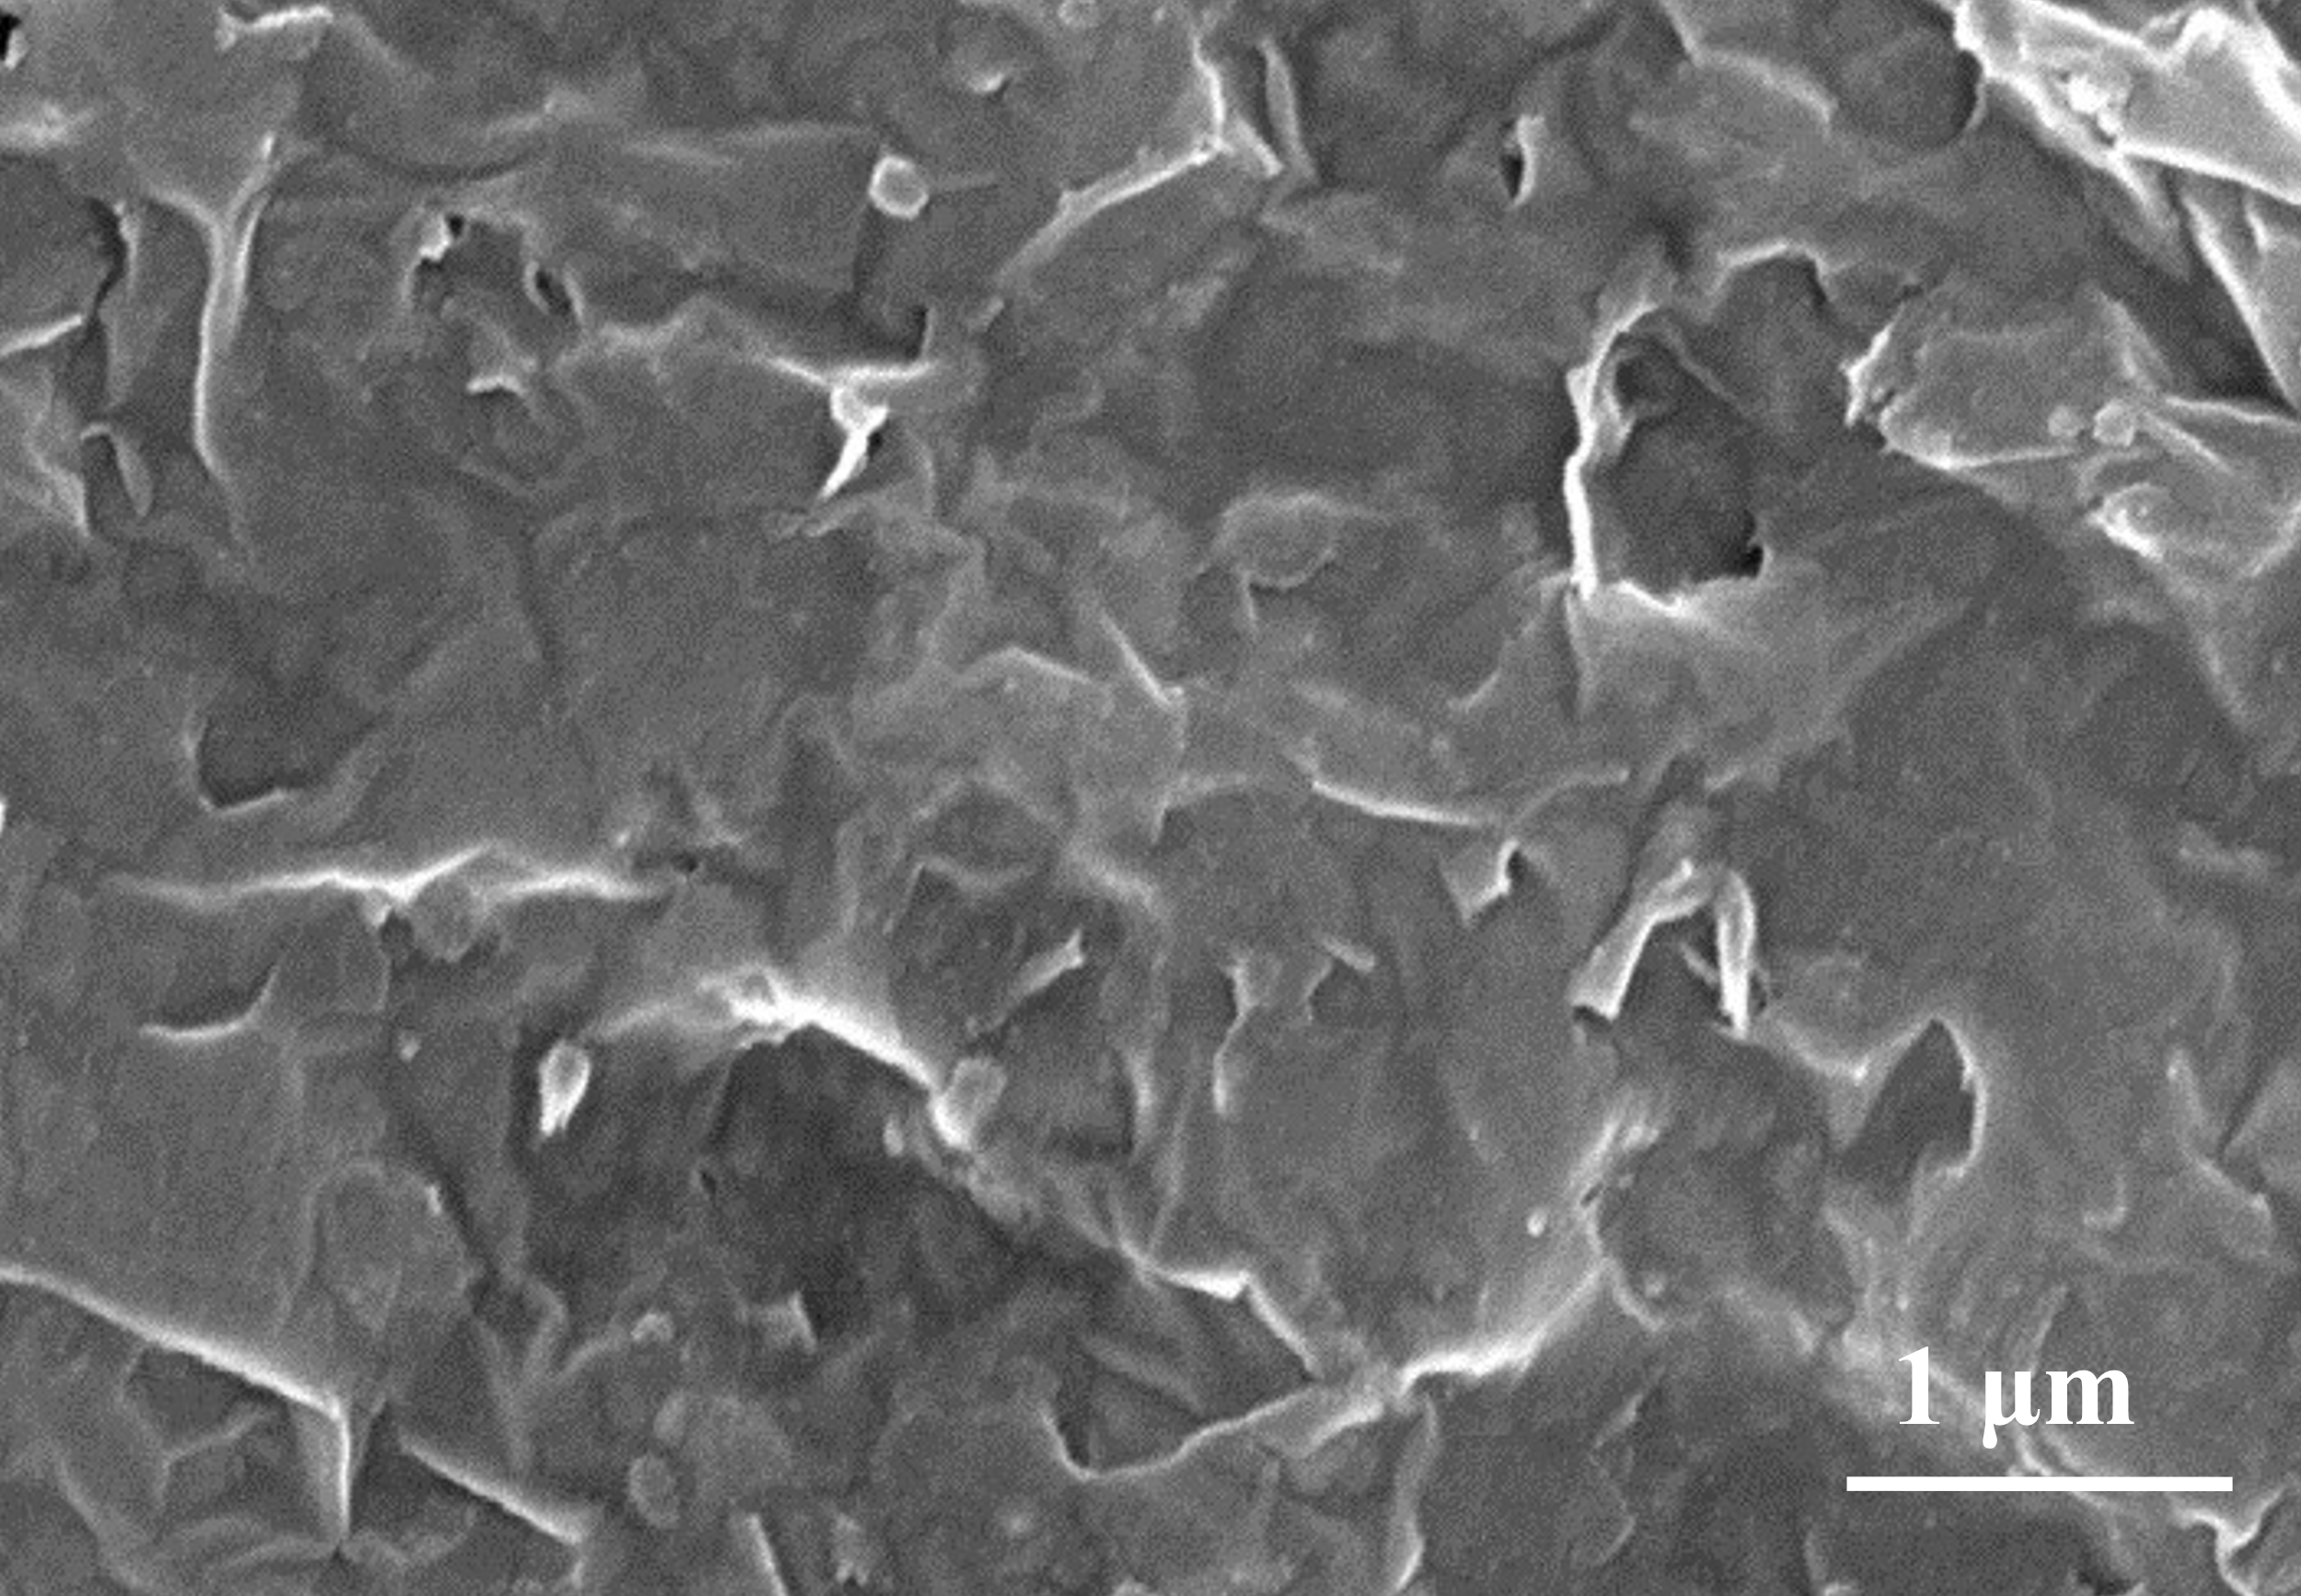


**Fig. S1 SEM image of the MXenes film.**


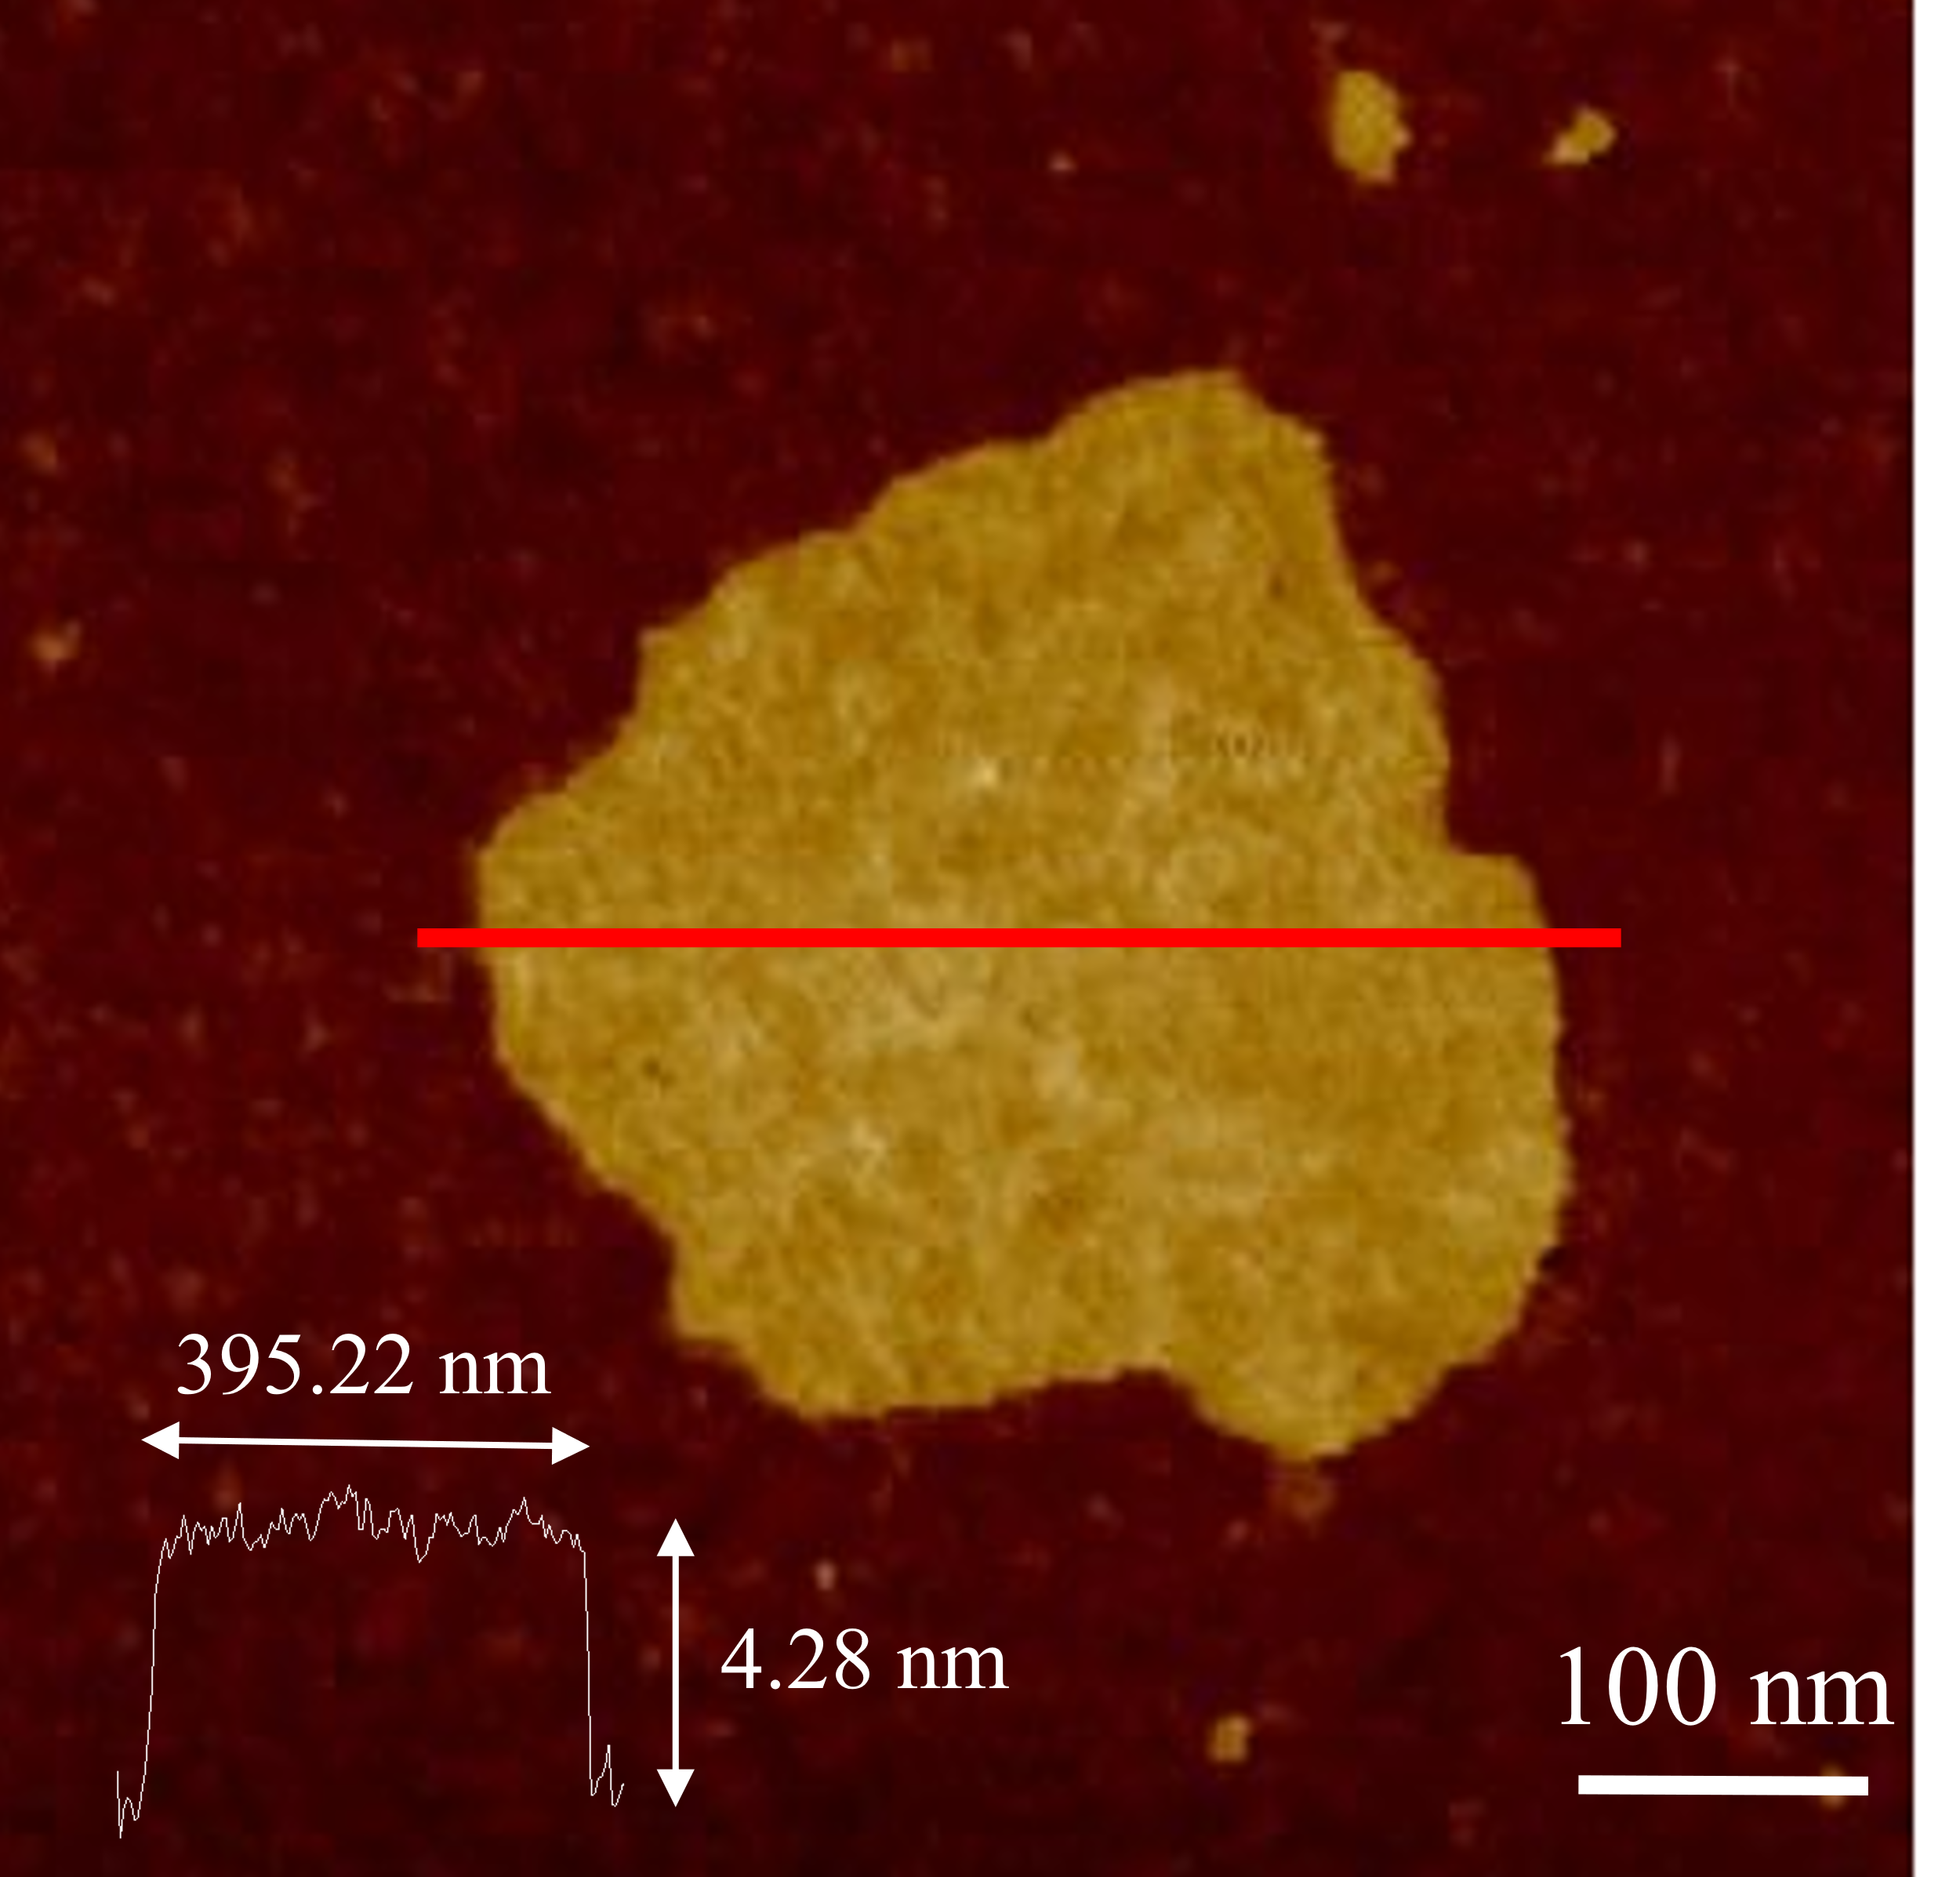


**Fig. S2 AFM image of the Co-TiO2 Nanosheet.** The Co-TiO2 Nanosheet showed a thickness of 4.28 nm and a lateral size of 395.22 nm.


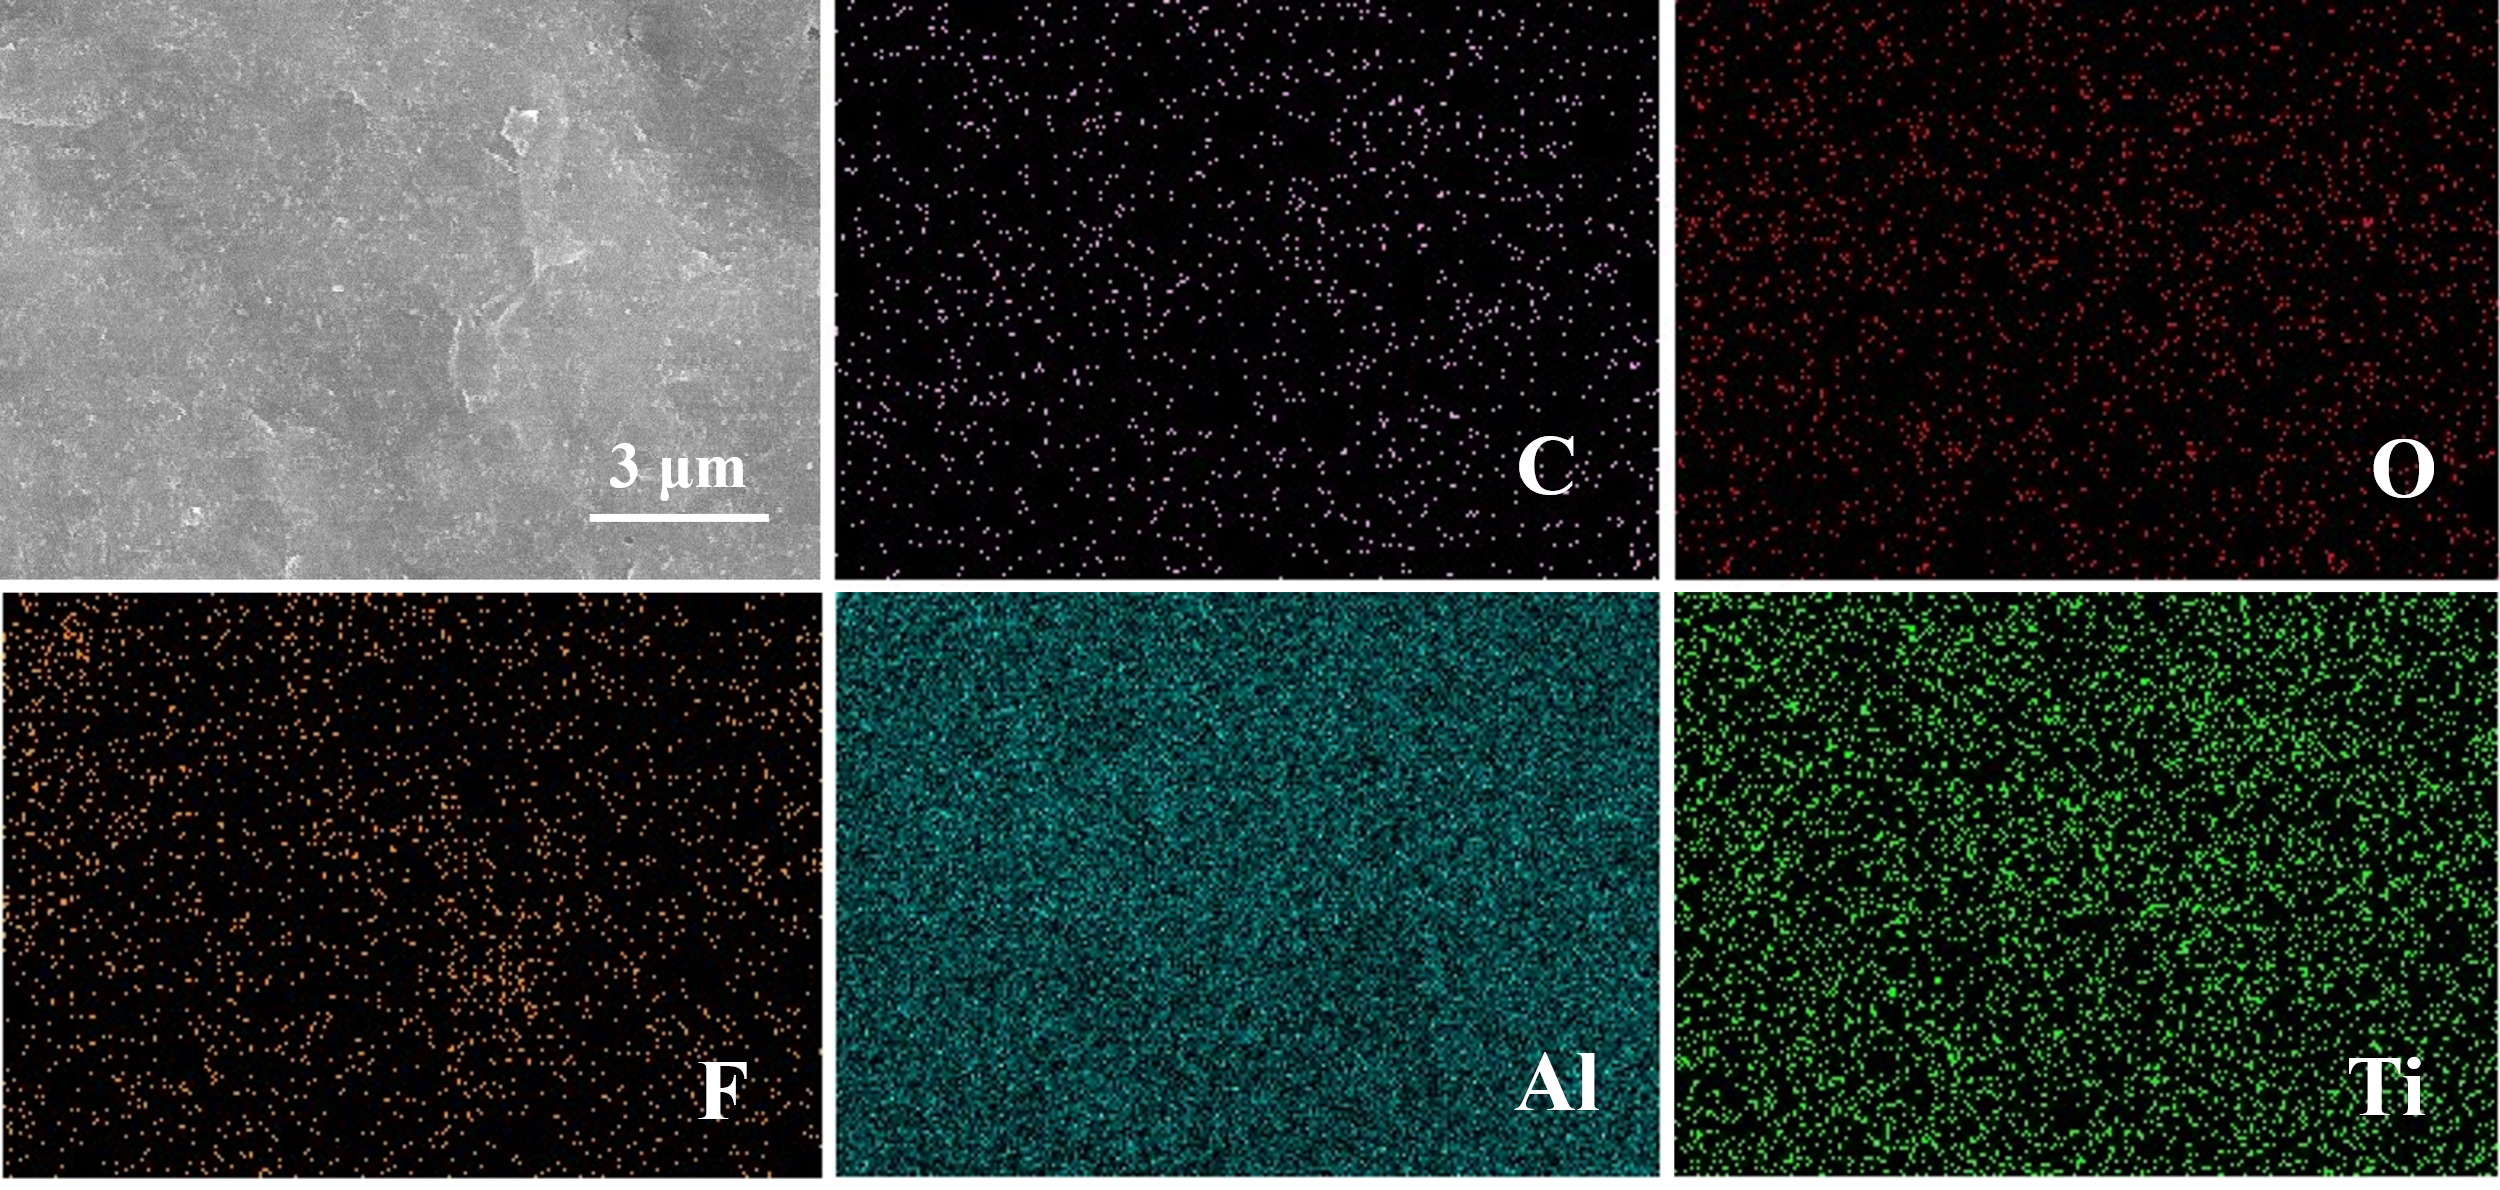


**Fig. S3 EDX mapping of the elemental composition of MXenes.** MXenes contained C, O, F, Al and Ti elements.


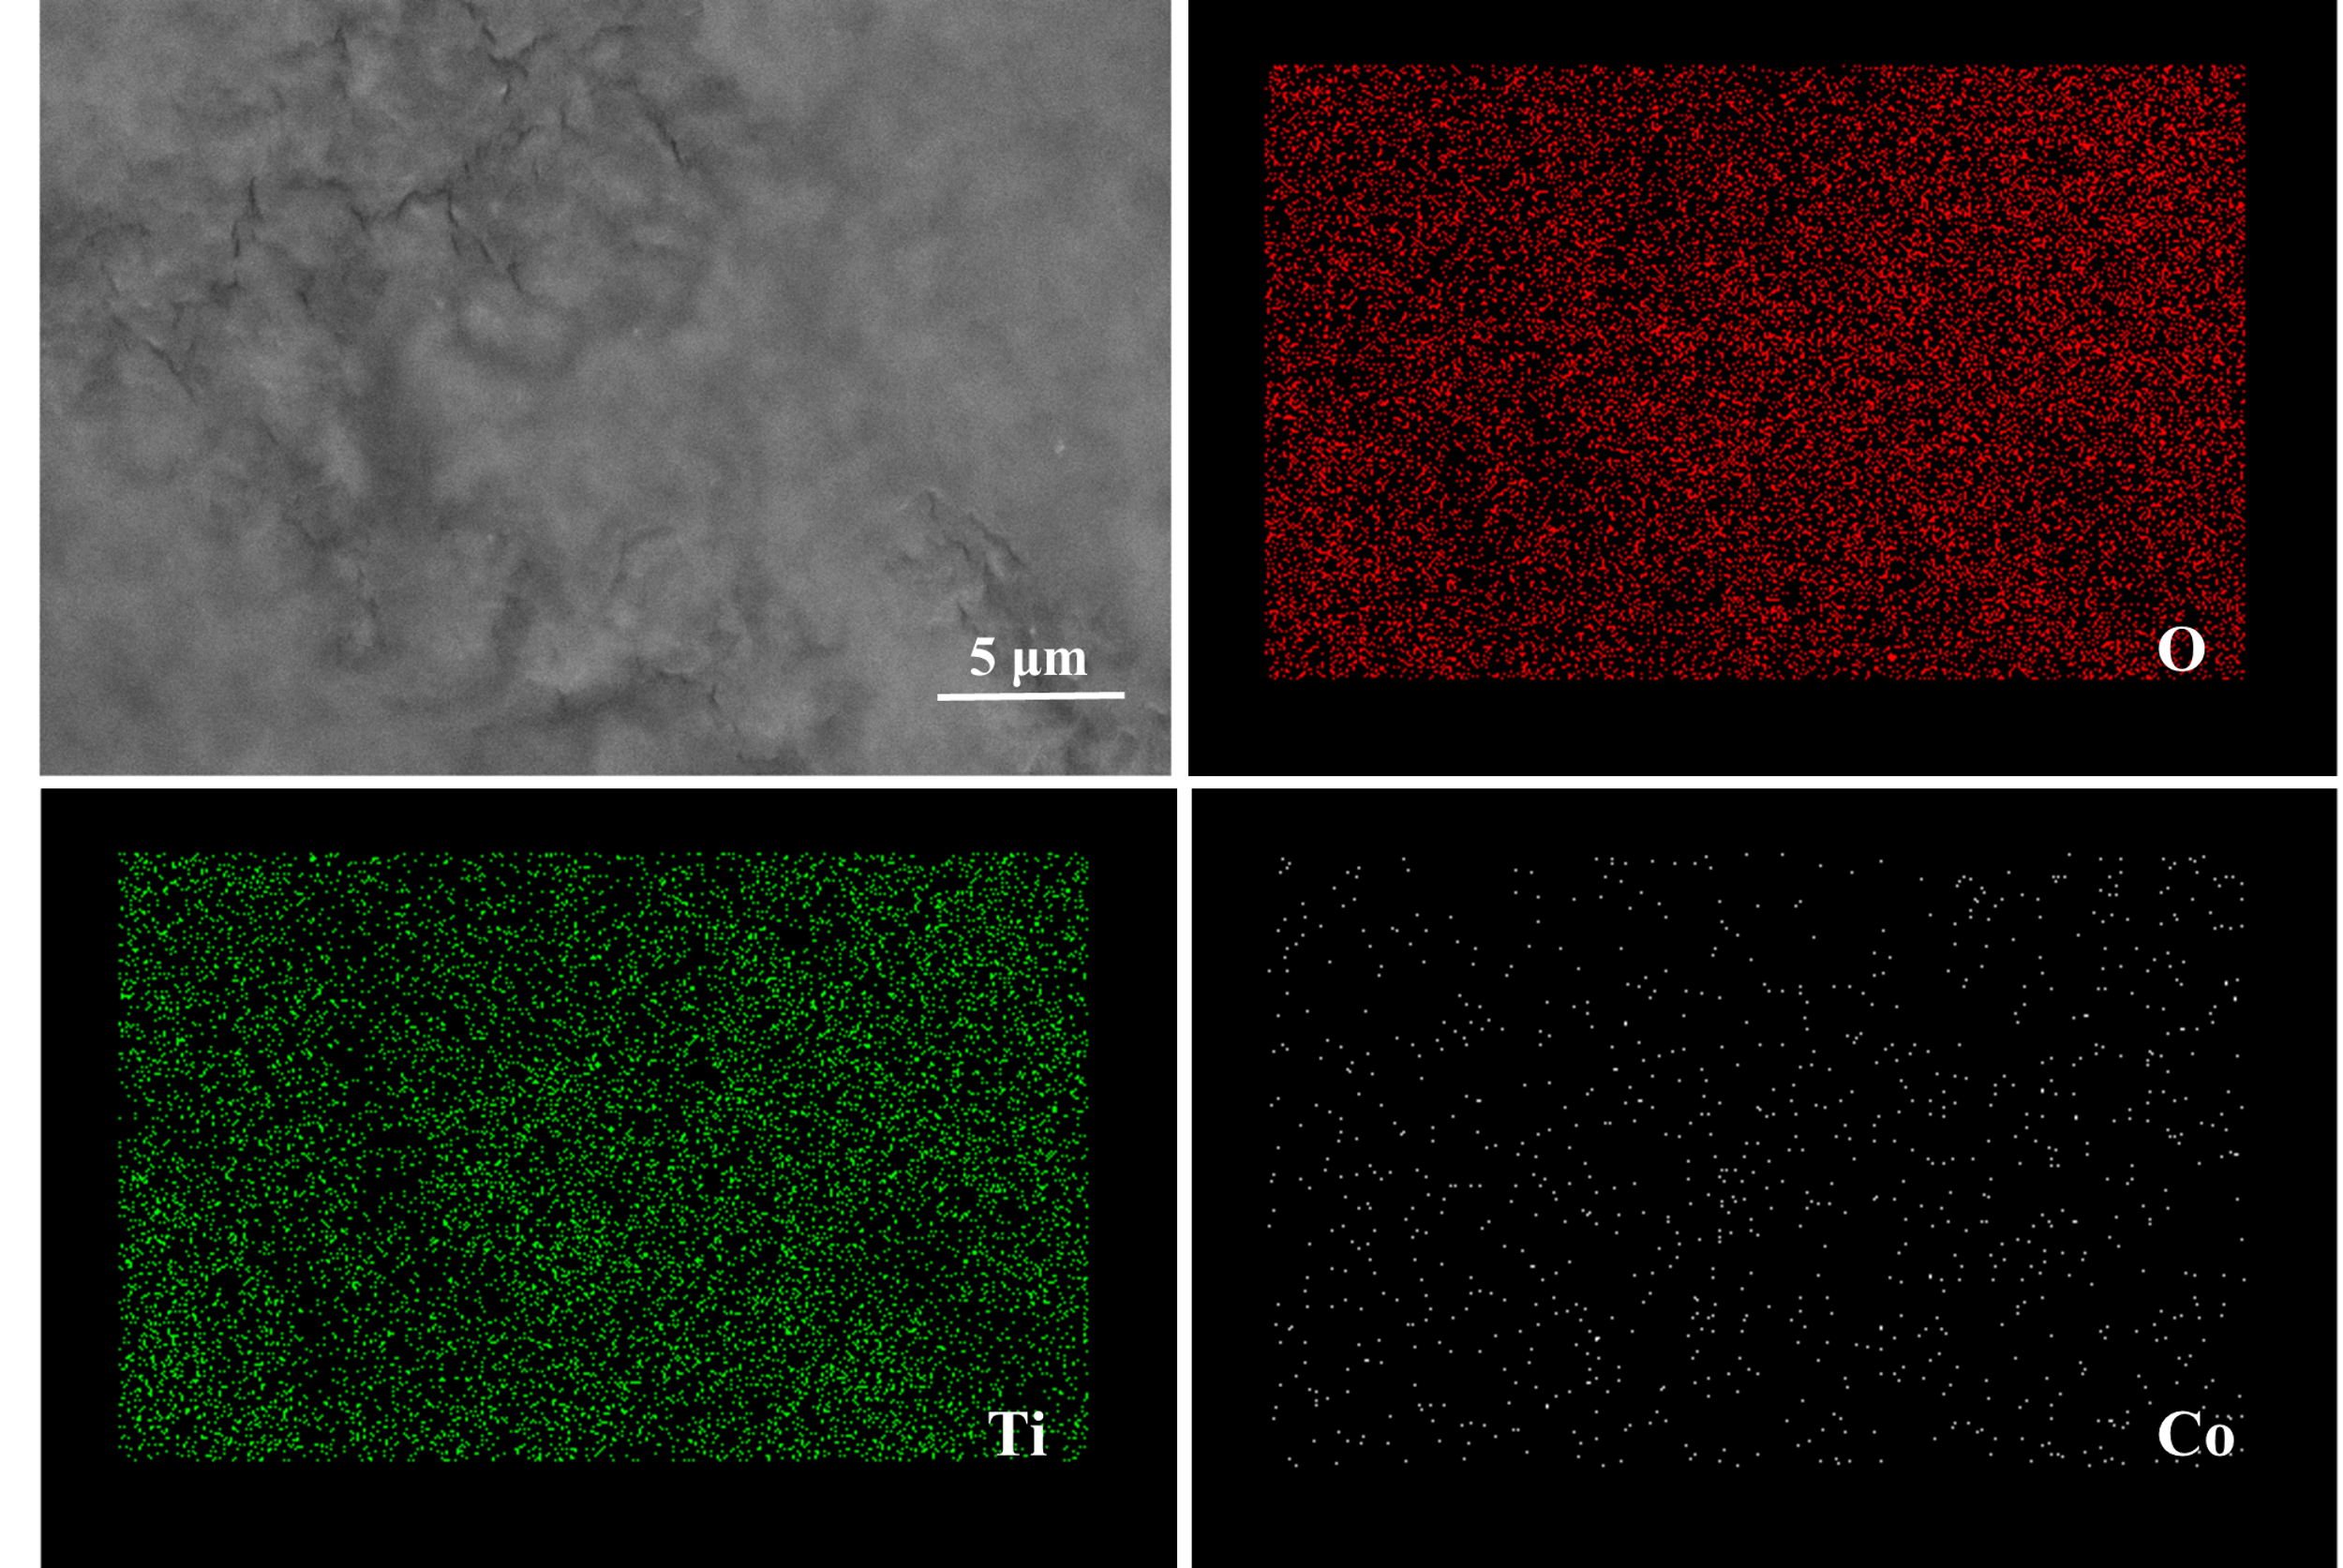


**Fig. S4 EDX mapping of the elemental composition of** **Co-TiO2.** Co-TiO2 contained O, Ti and Co elements.


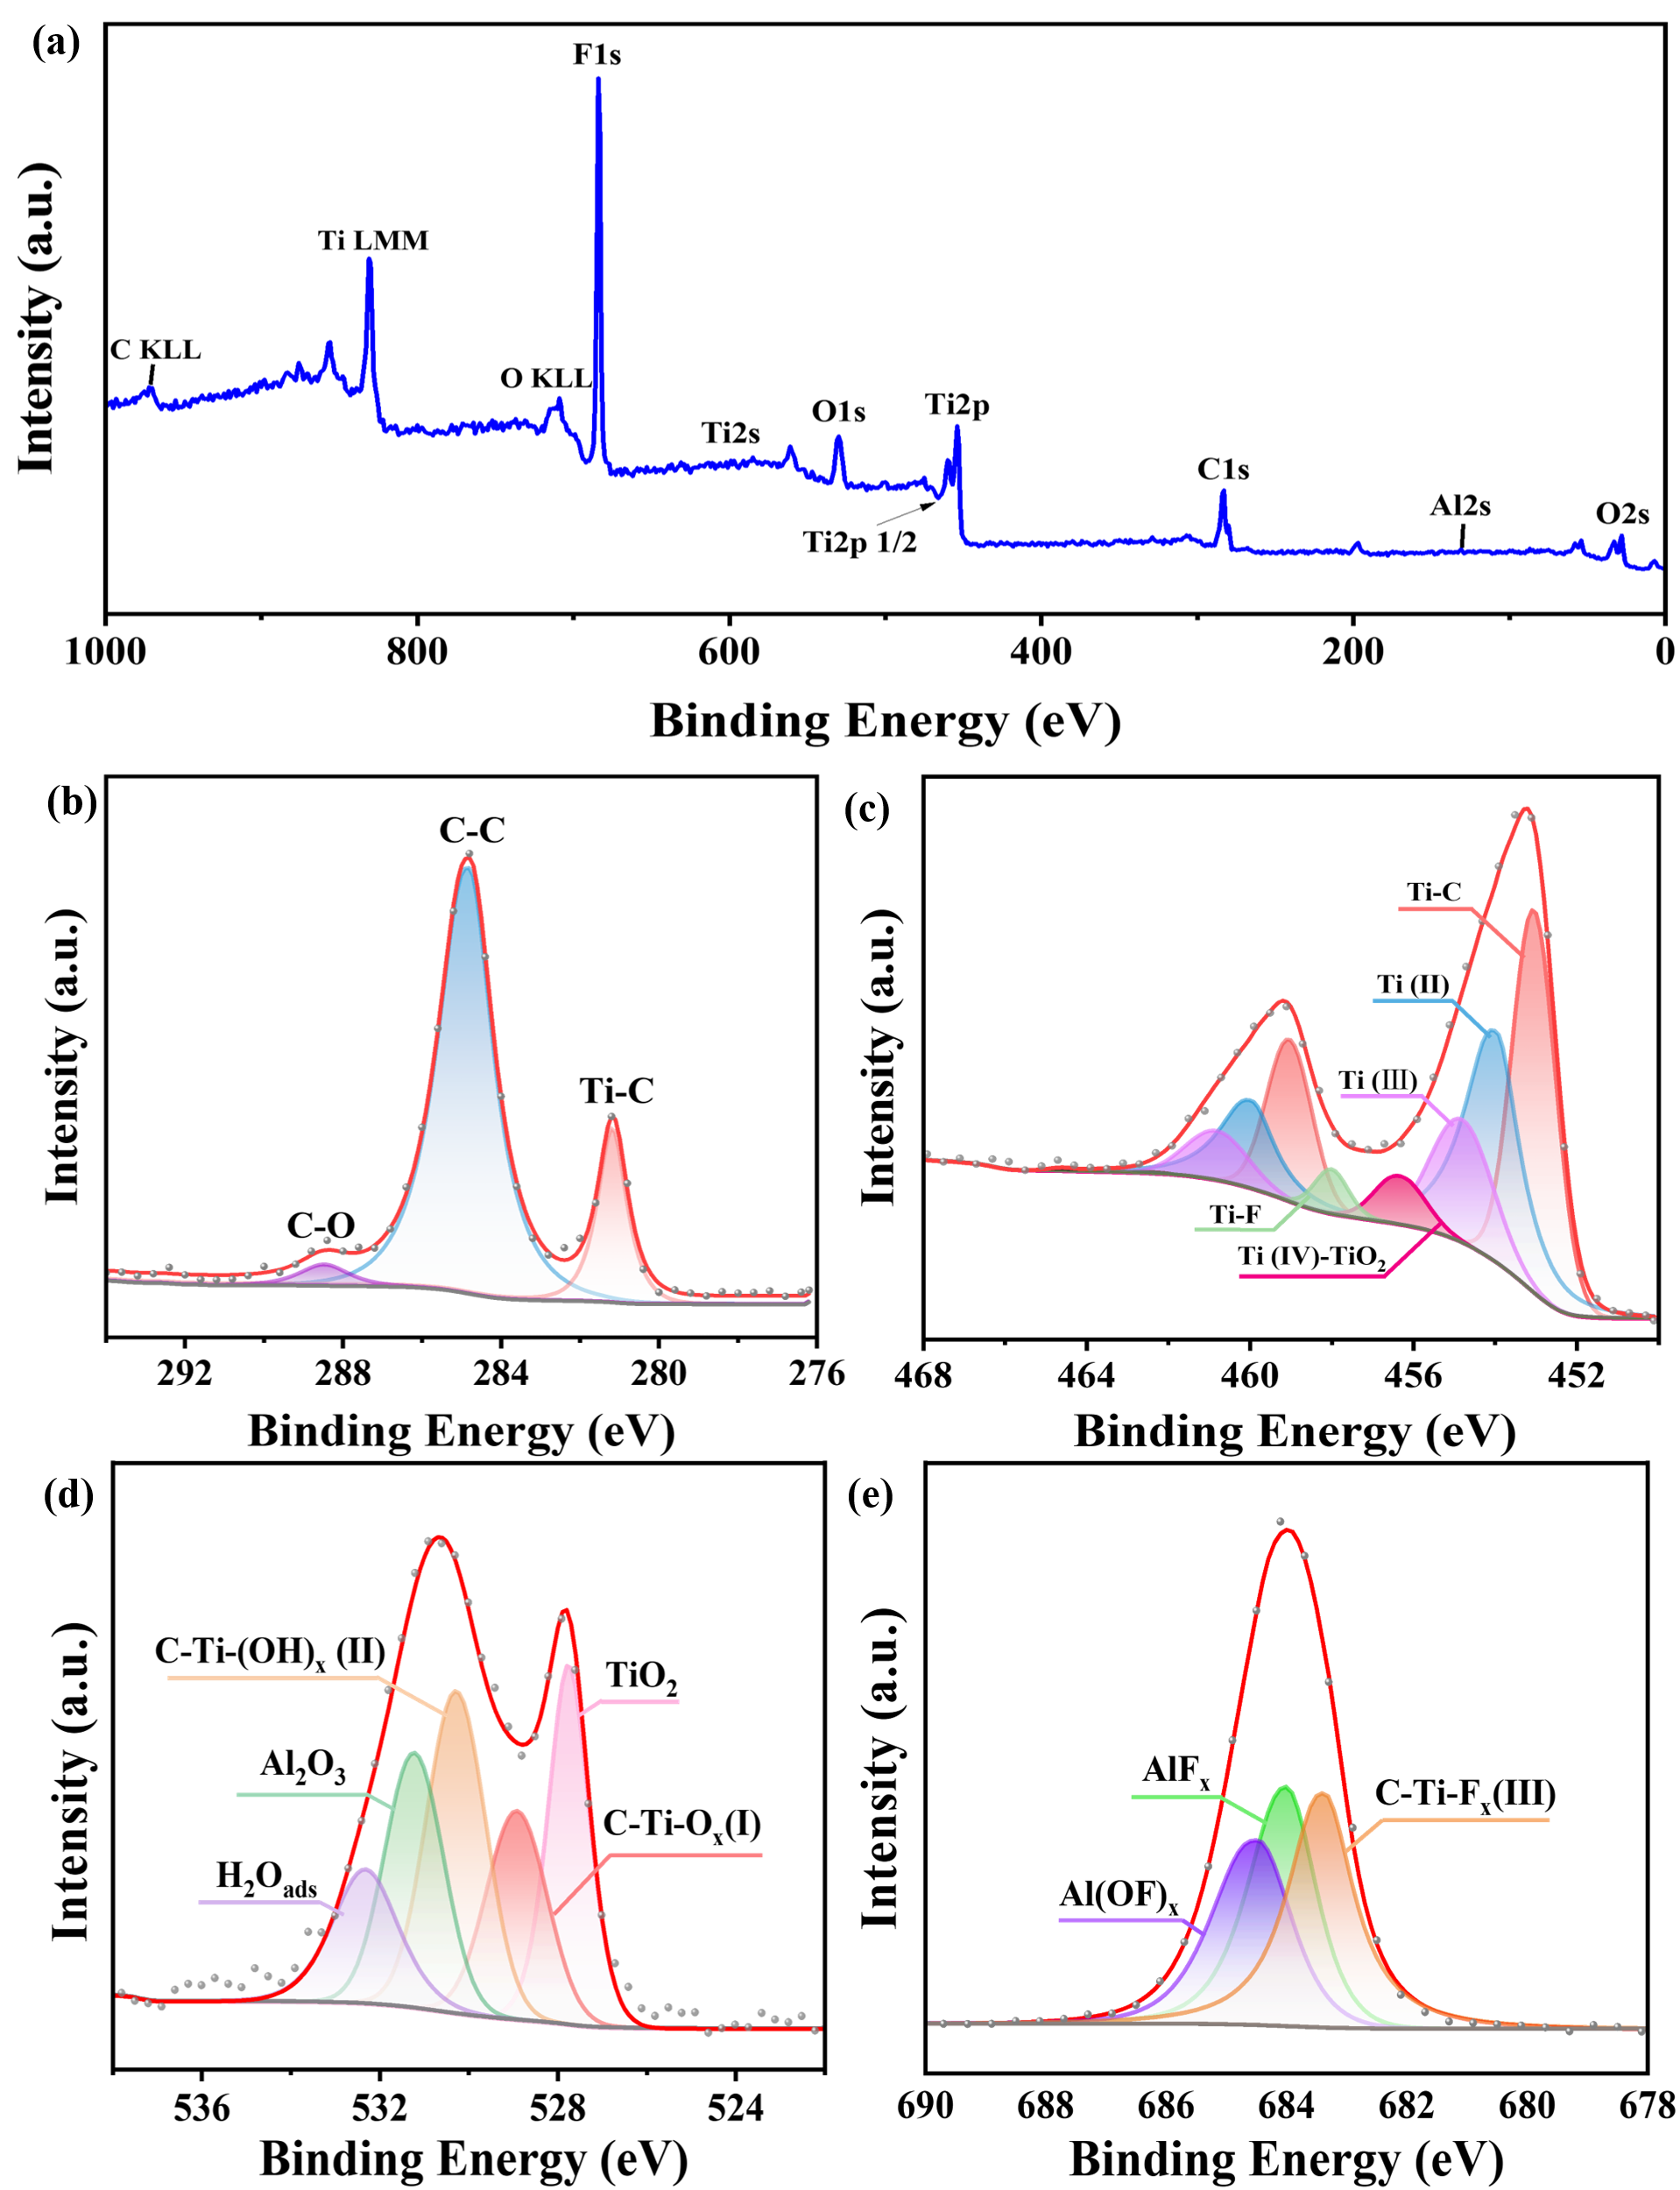


**Fig. S5 XPS spectra of MXenes powder.** (a) survey, (b–e) high resolution spectra of C1s, Ti 2p, O 1s, and F1s regions, respectively.


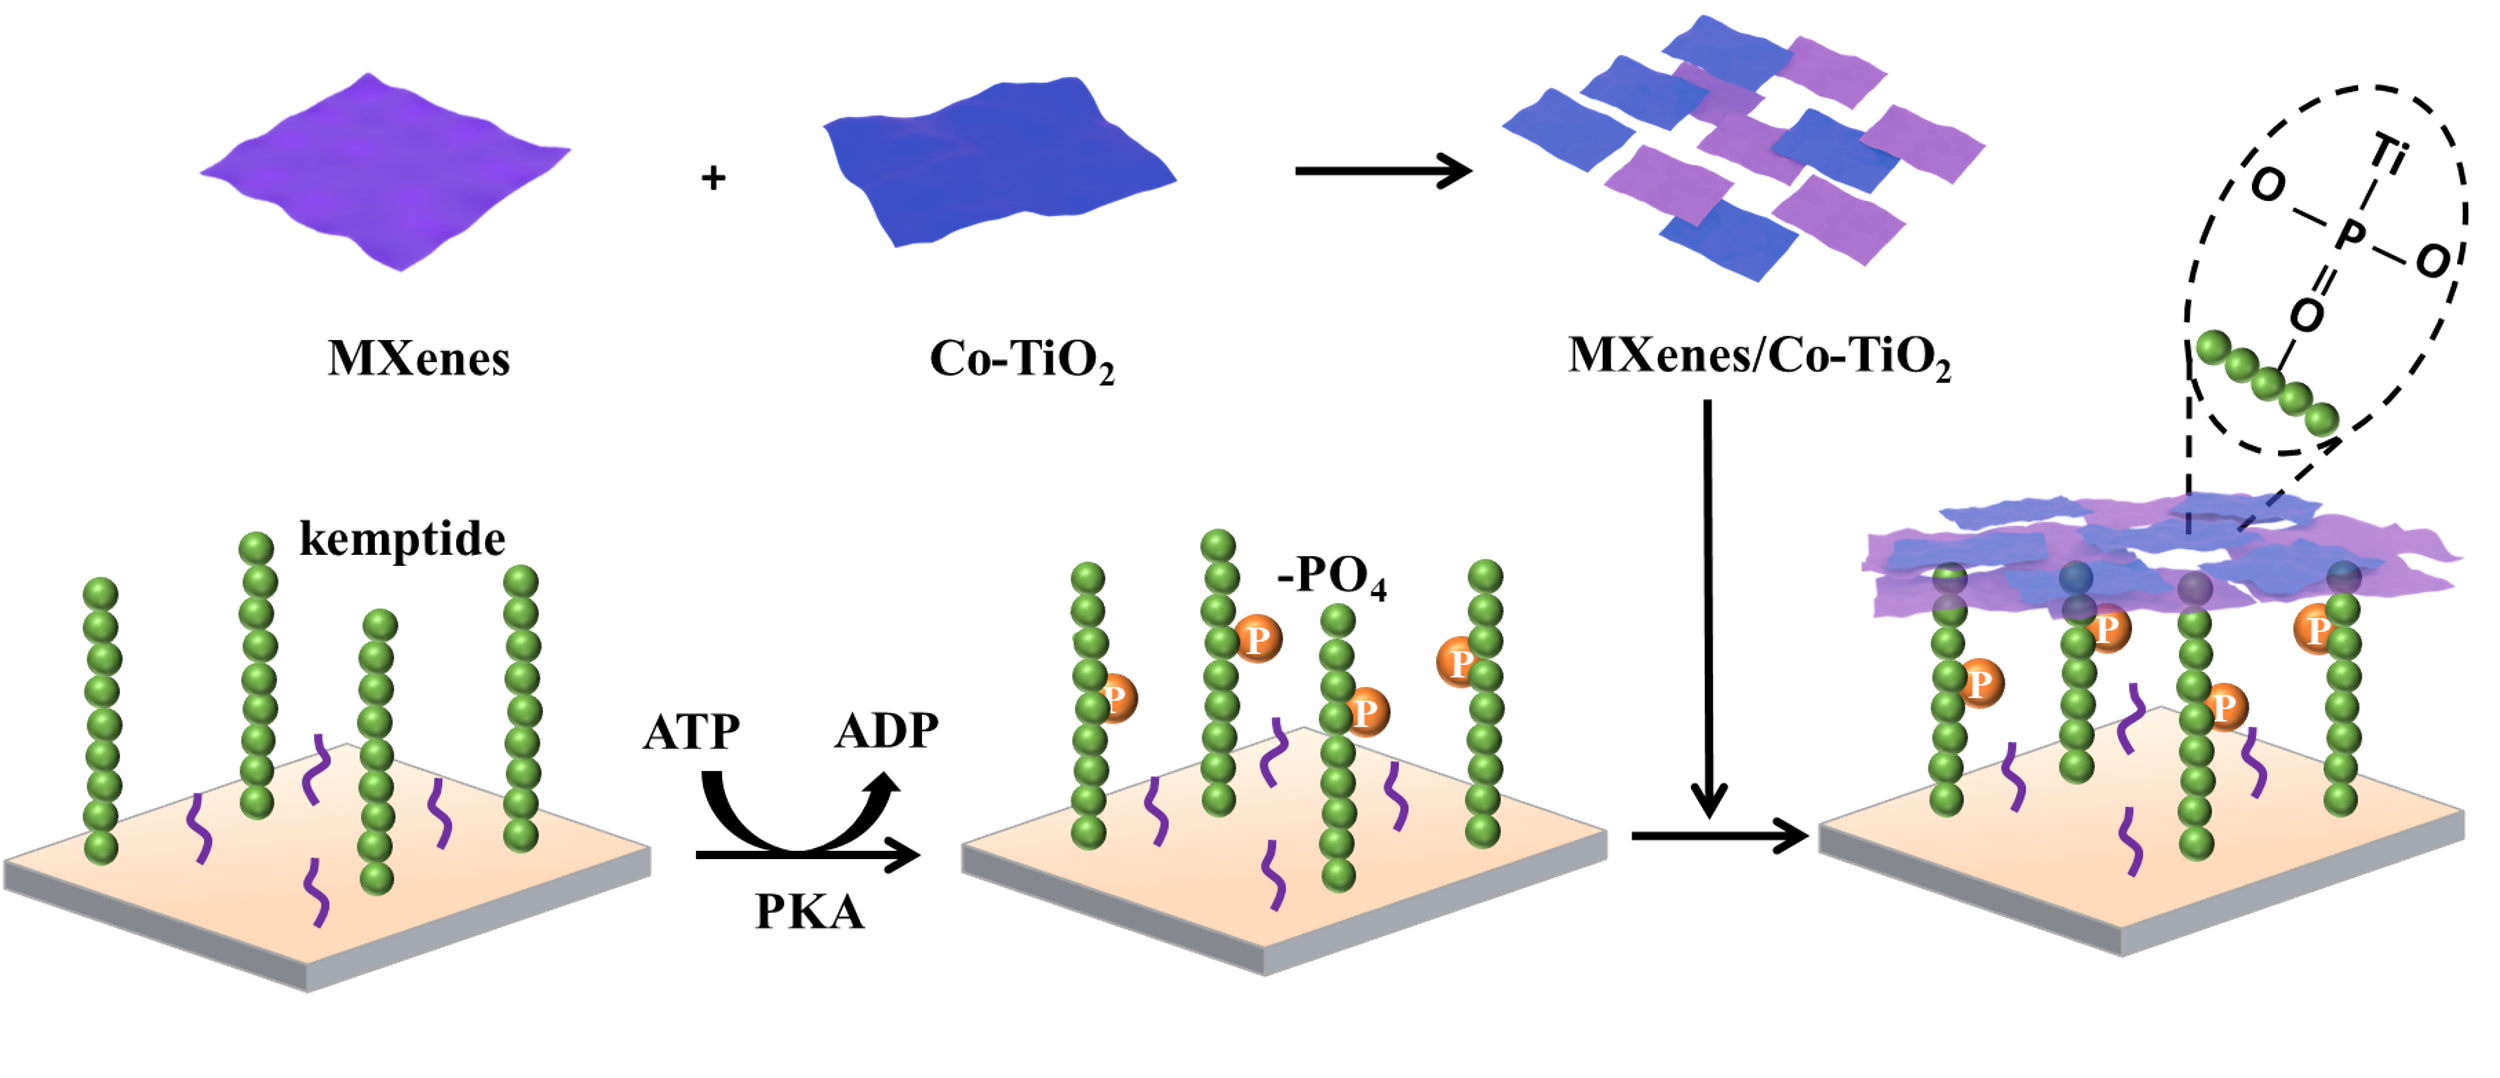


**Fig. S6 Preparation process of biosensor.** In brief, Ti⁴⁺ sites within the MXenes/Co-TiO₂ composite selectively recognize phosphate groups on the kinase phosphorylation substrate (kemptide) via coordination interactions. Detailed descriptions are provided in the main text.


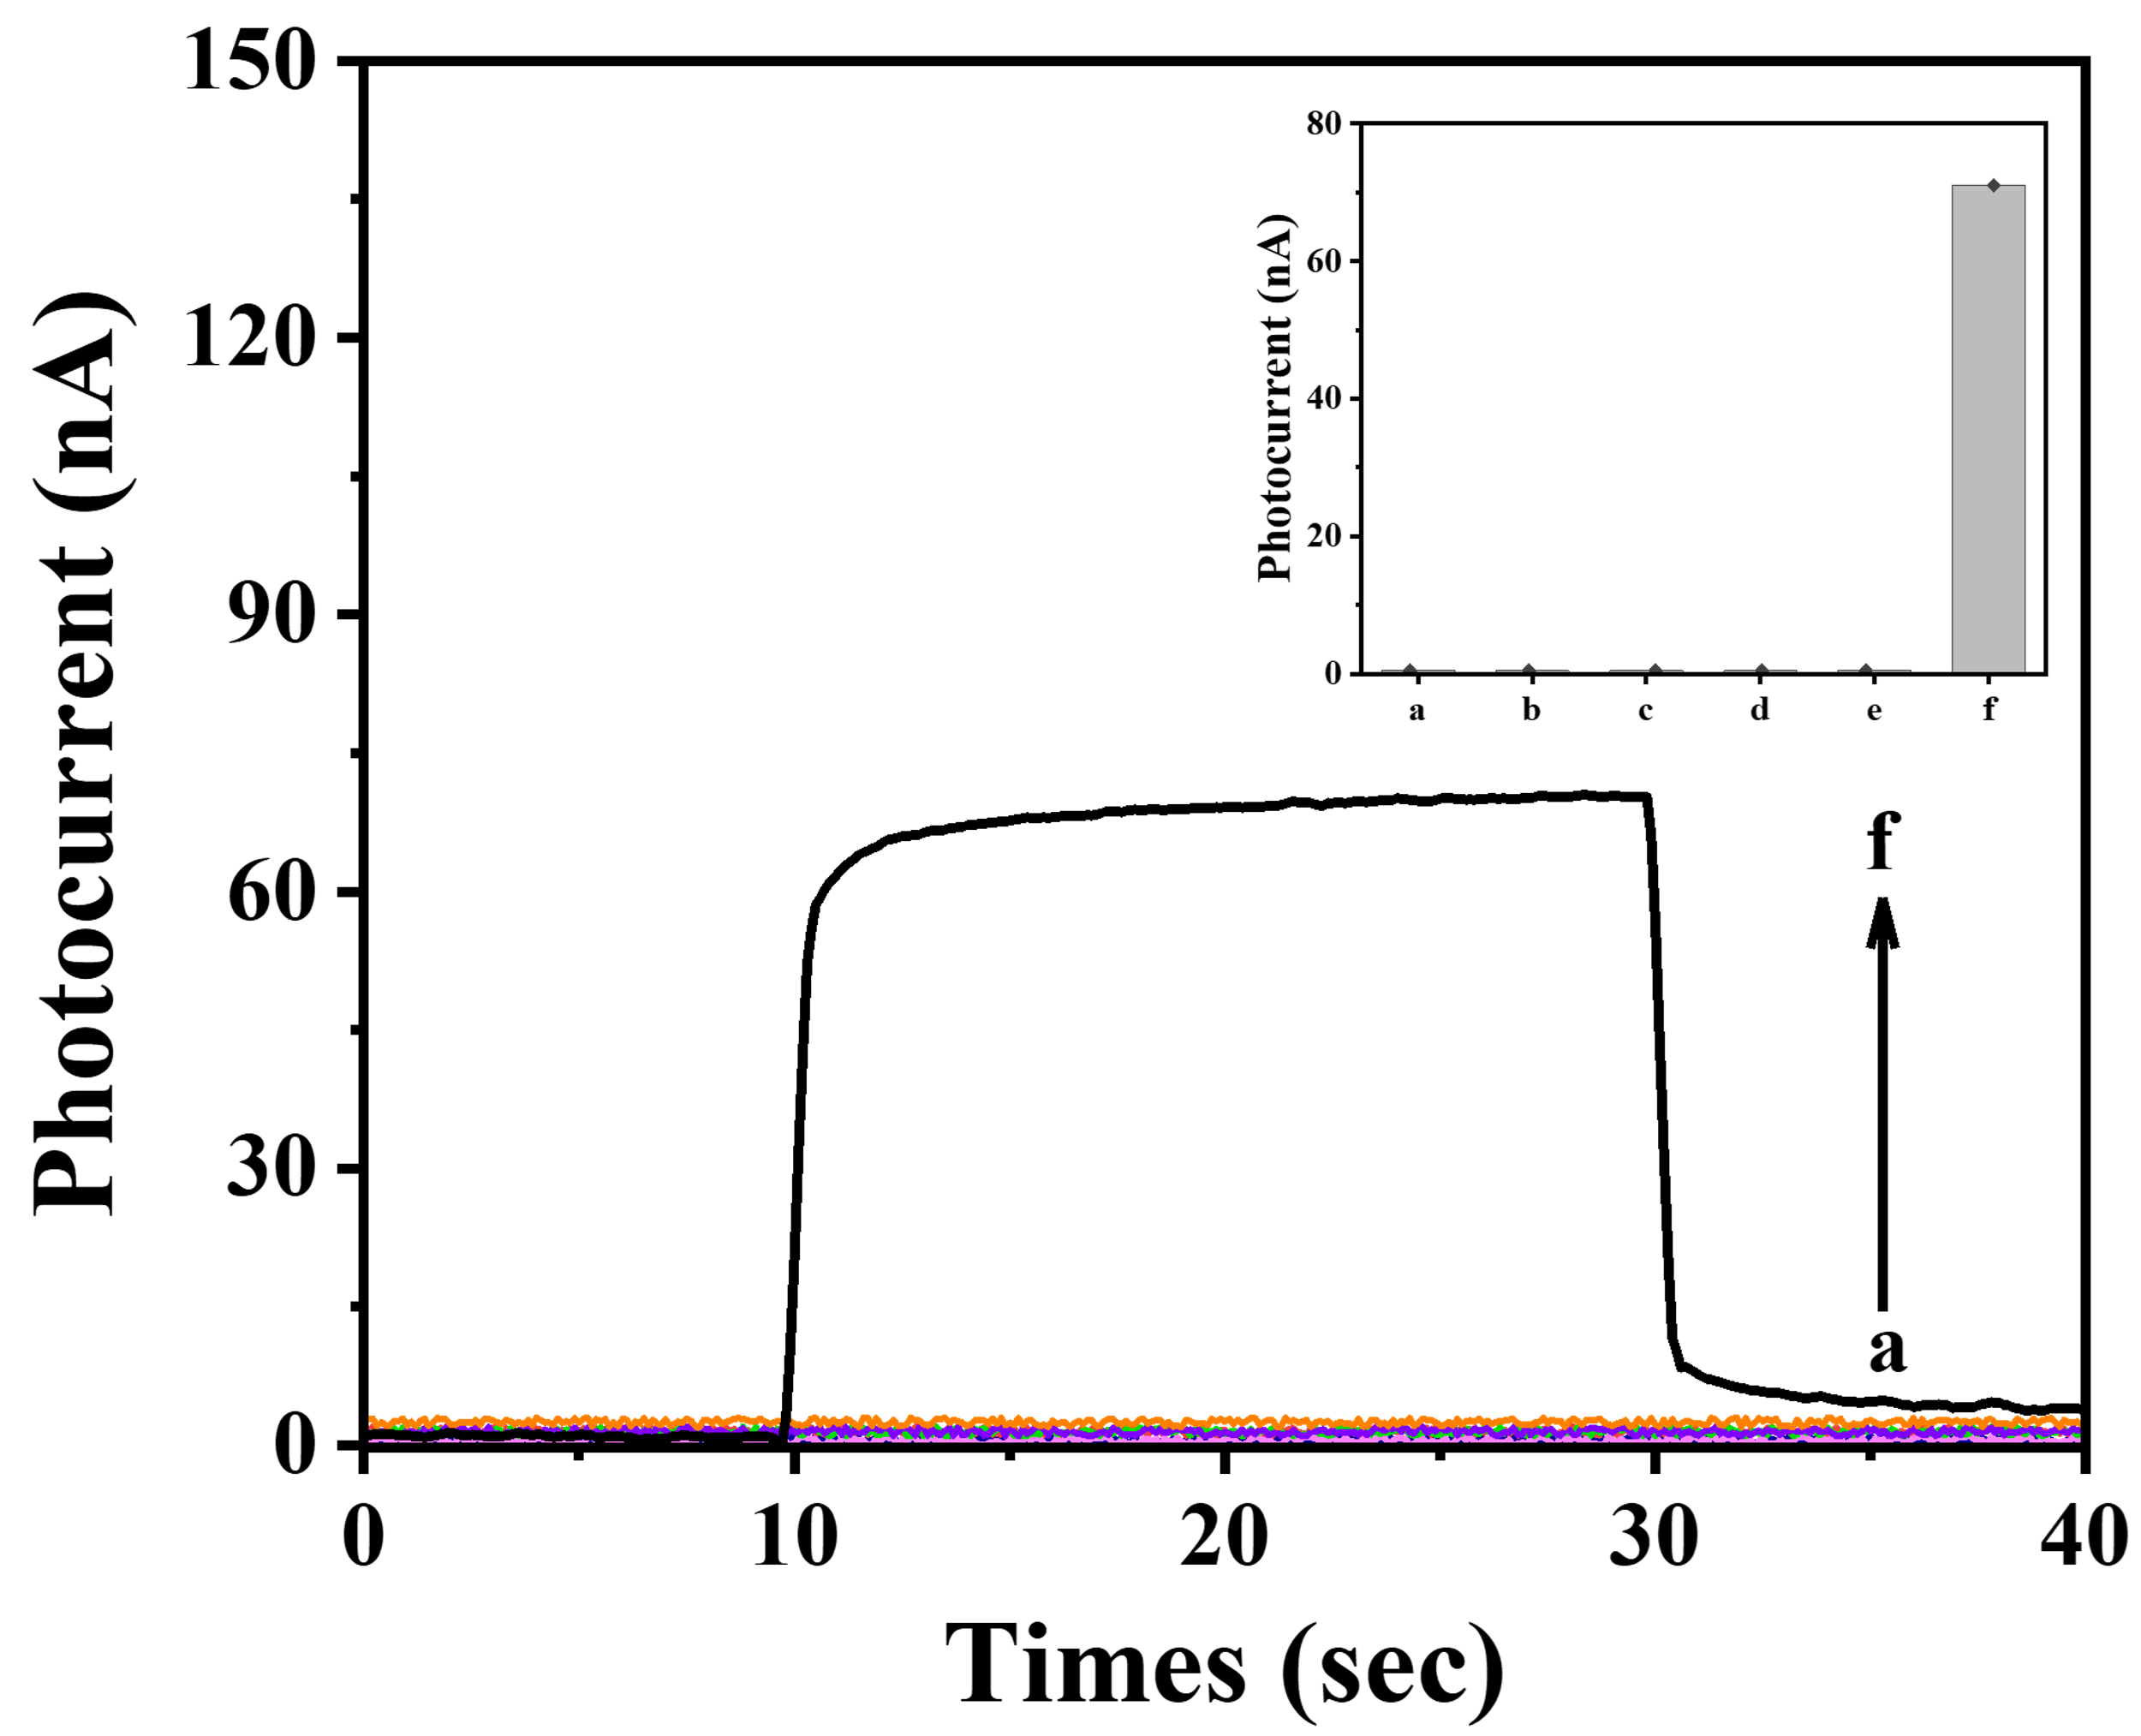


**Fig. S7 The photocurrent response diagram corresponding to progressively modified electrodes.** (a) bare ITO, (b) chitosan-modified ITO, (c) glutaraldehyde/chitosan/ITO, (d) kemptide/glutaraldehyde/chitosan/ITO, (e) phosphorylated kemptide/glutaraldehyde/chitosan/ITO, and (f) MXenes/Co-TiO2 probe-functionalized electrode.


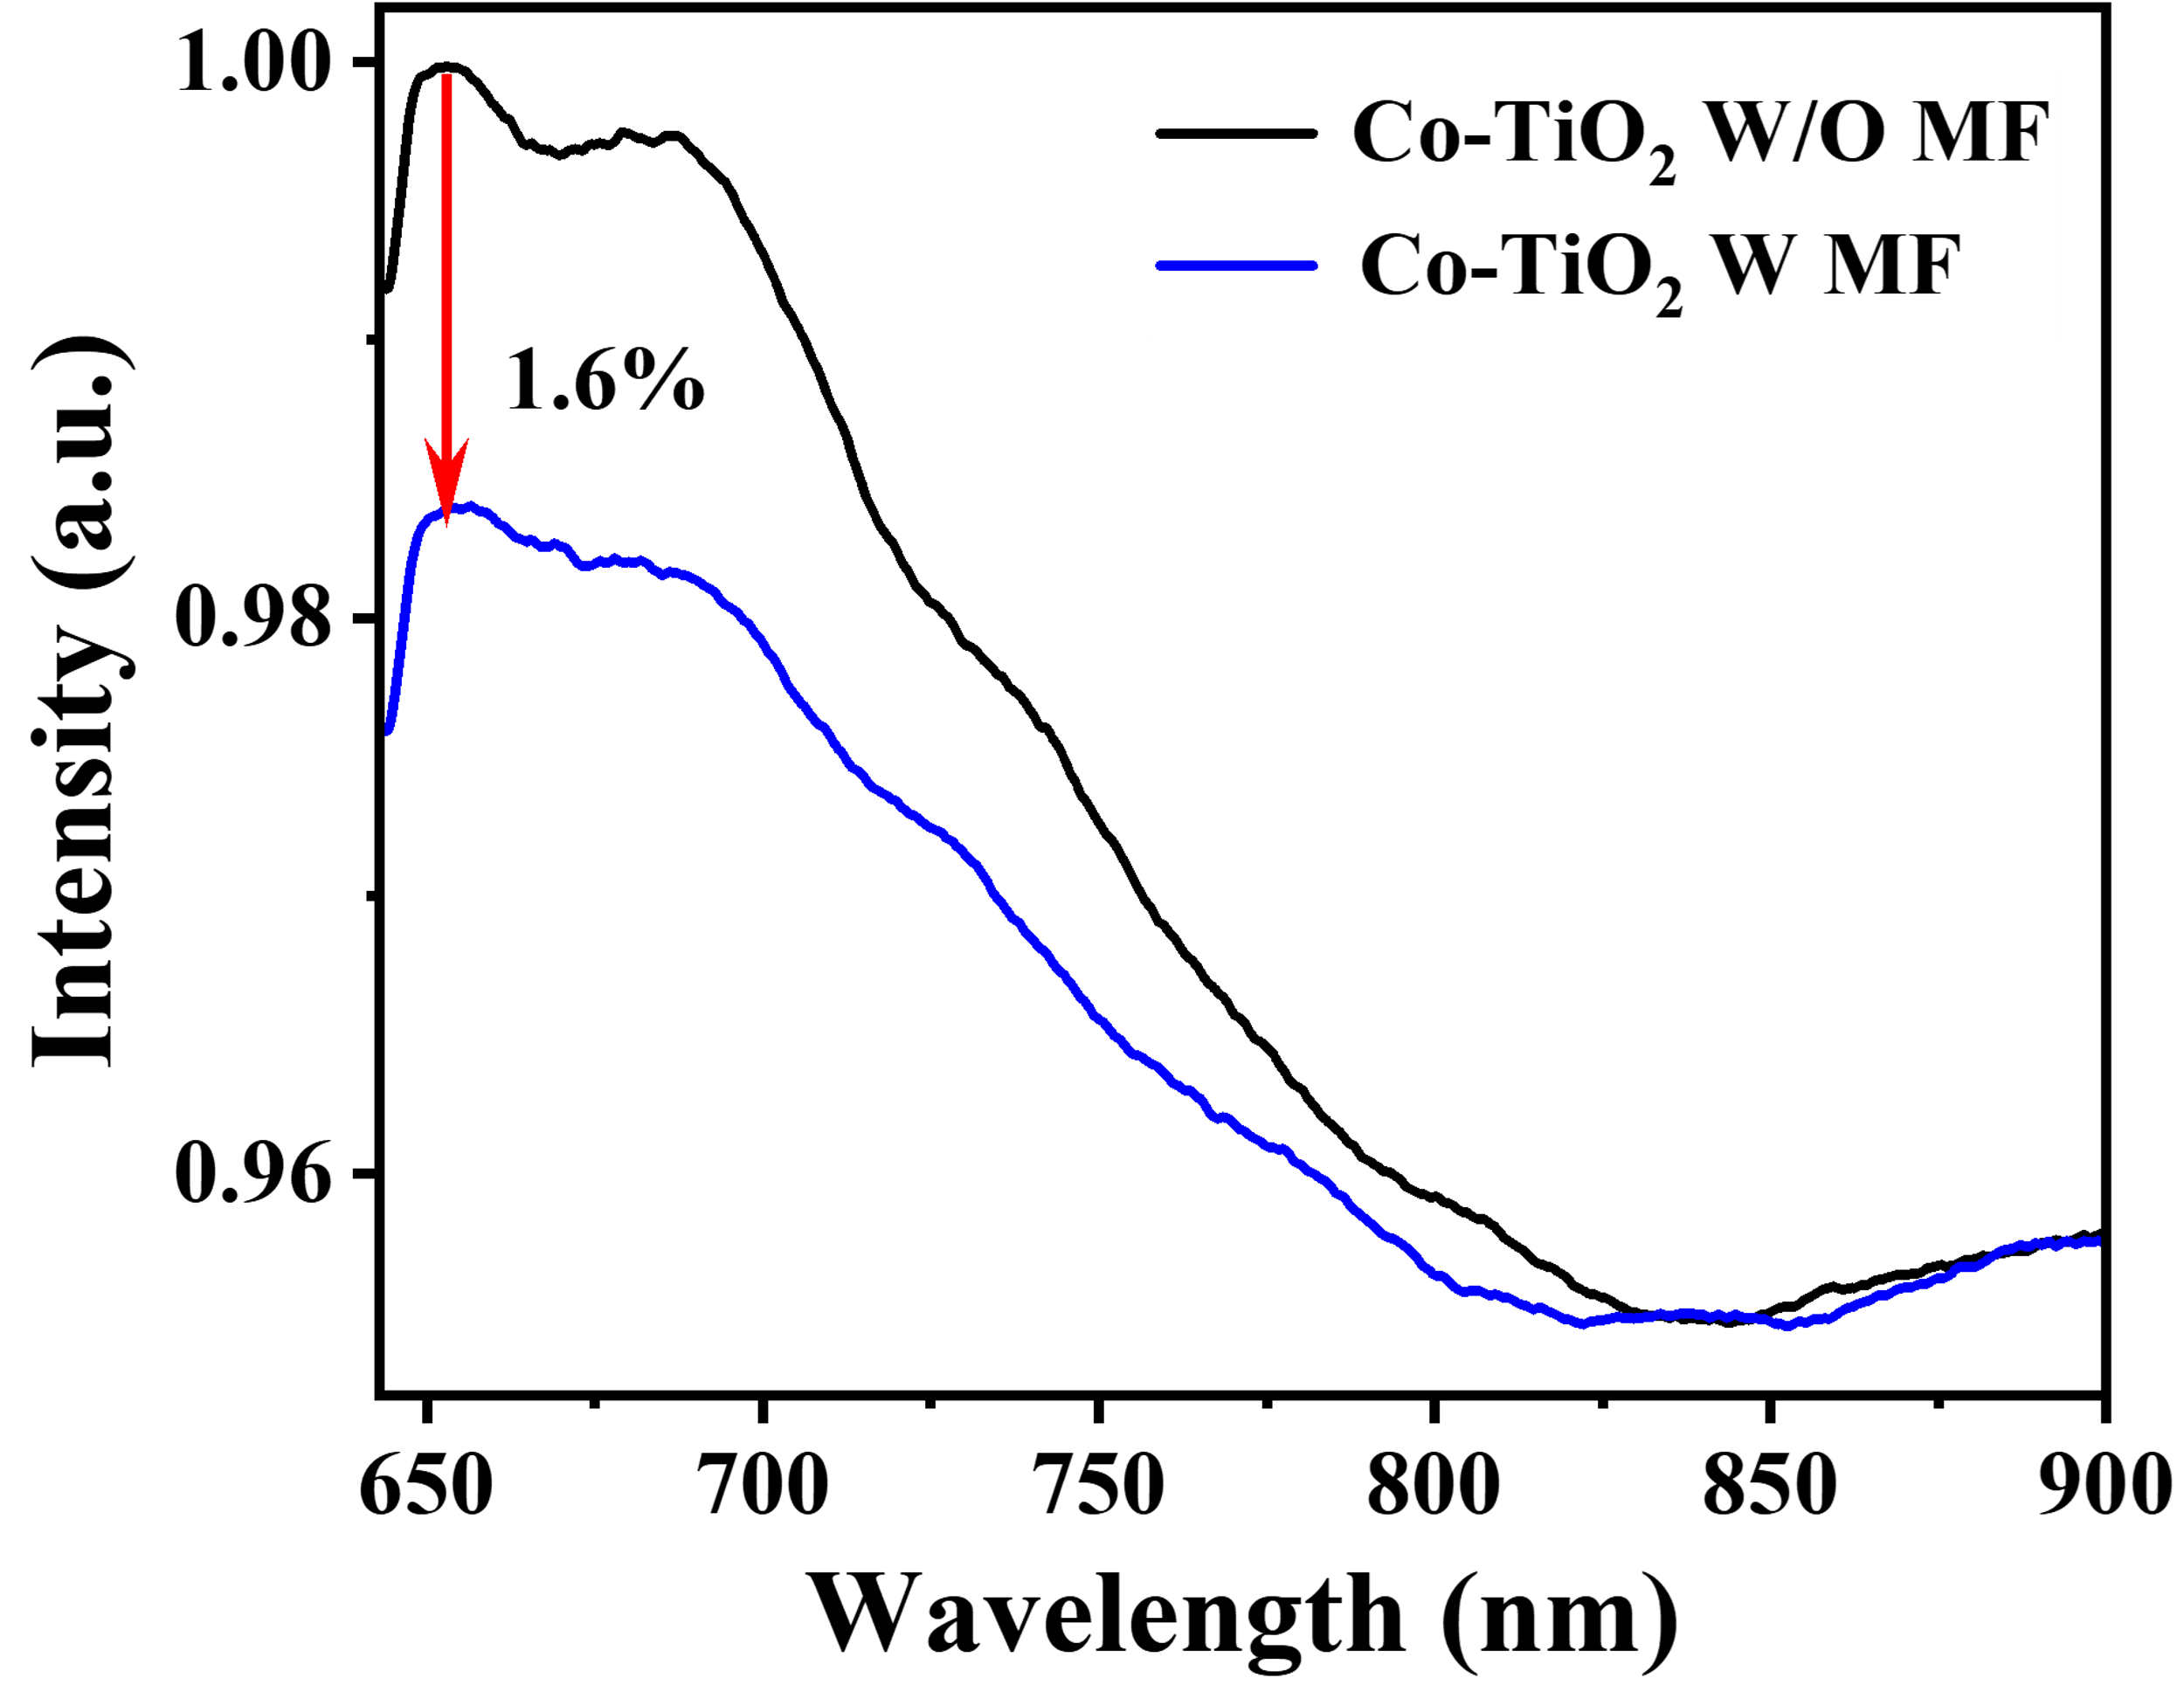


**Fig. S8 PL spectra of Co-TiO2 with MF and without MF conditions.** Under 532 nm laser excitation, the PL intensity of Co-TiO2 at 650 nm decreased by 1.6% under MF.


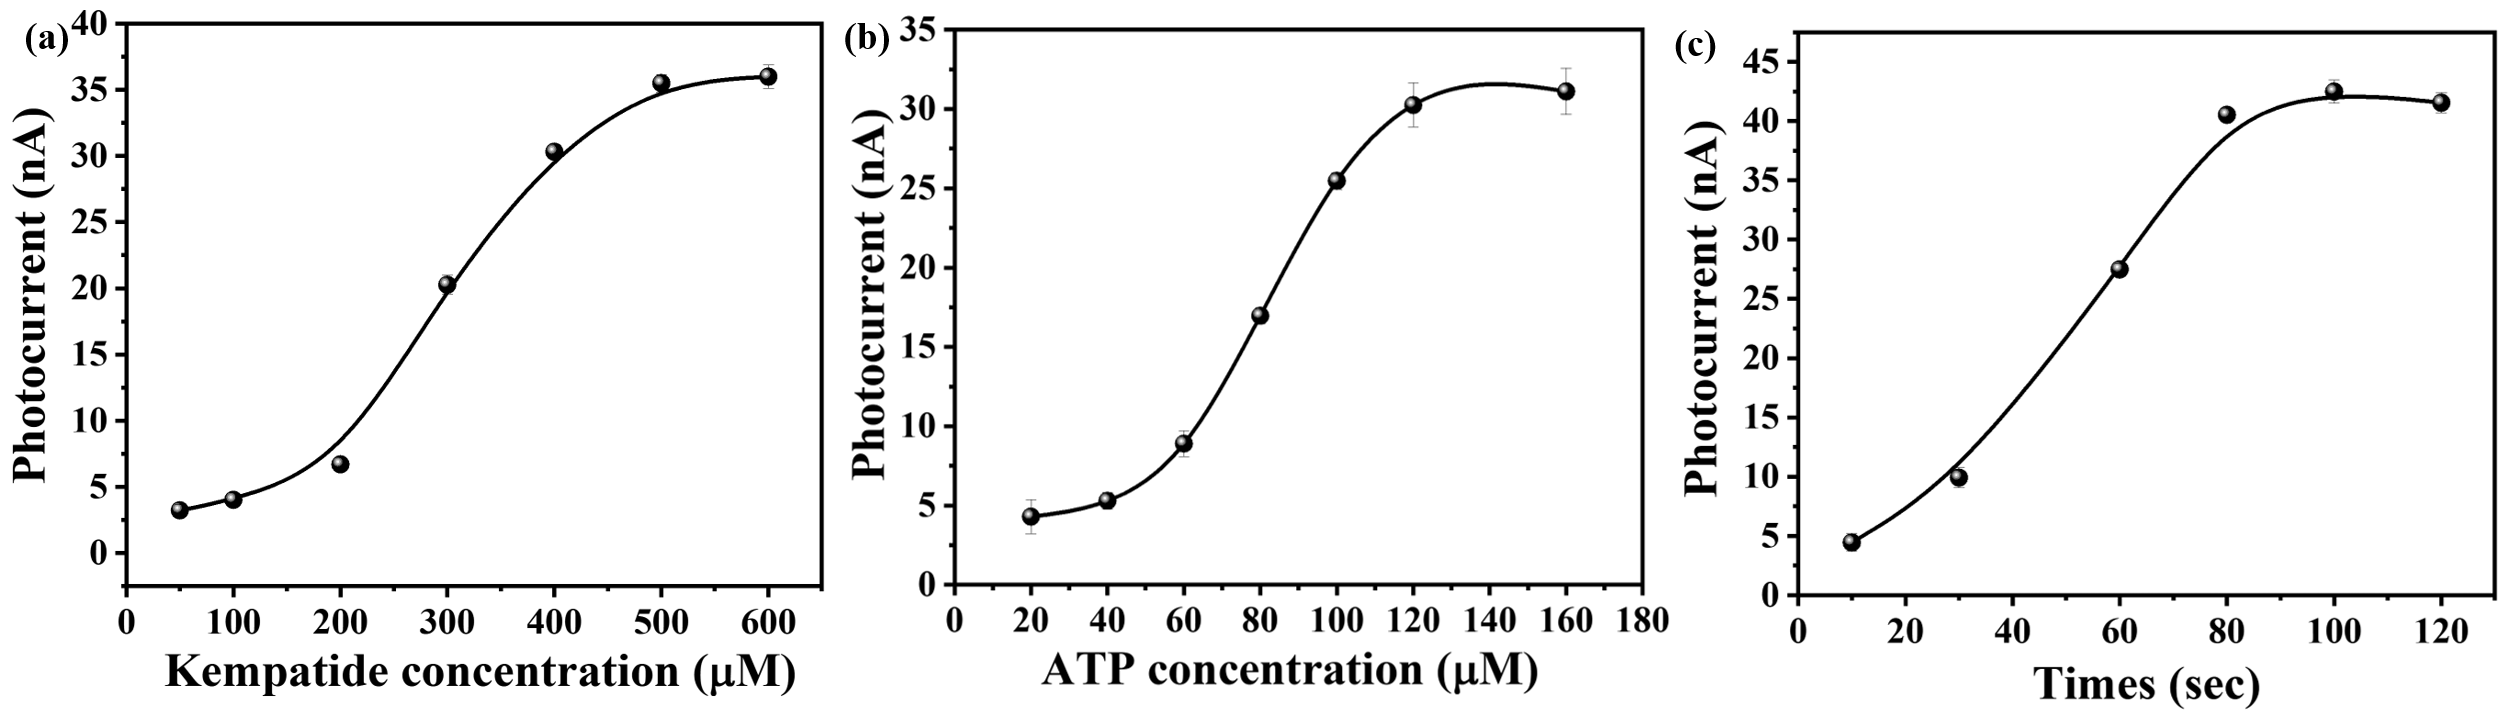


**Fig. S9 The intensity of the photocurrent signal changes with different kempatide concentrations.** (a) kempatide concentration, (b) ATP concentrationsand and (c) phosphorylation timesc. The light power density was 190 mW cm-2, electrode area was 0.5 cm2.


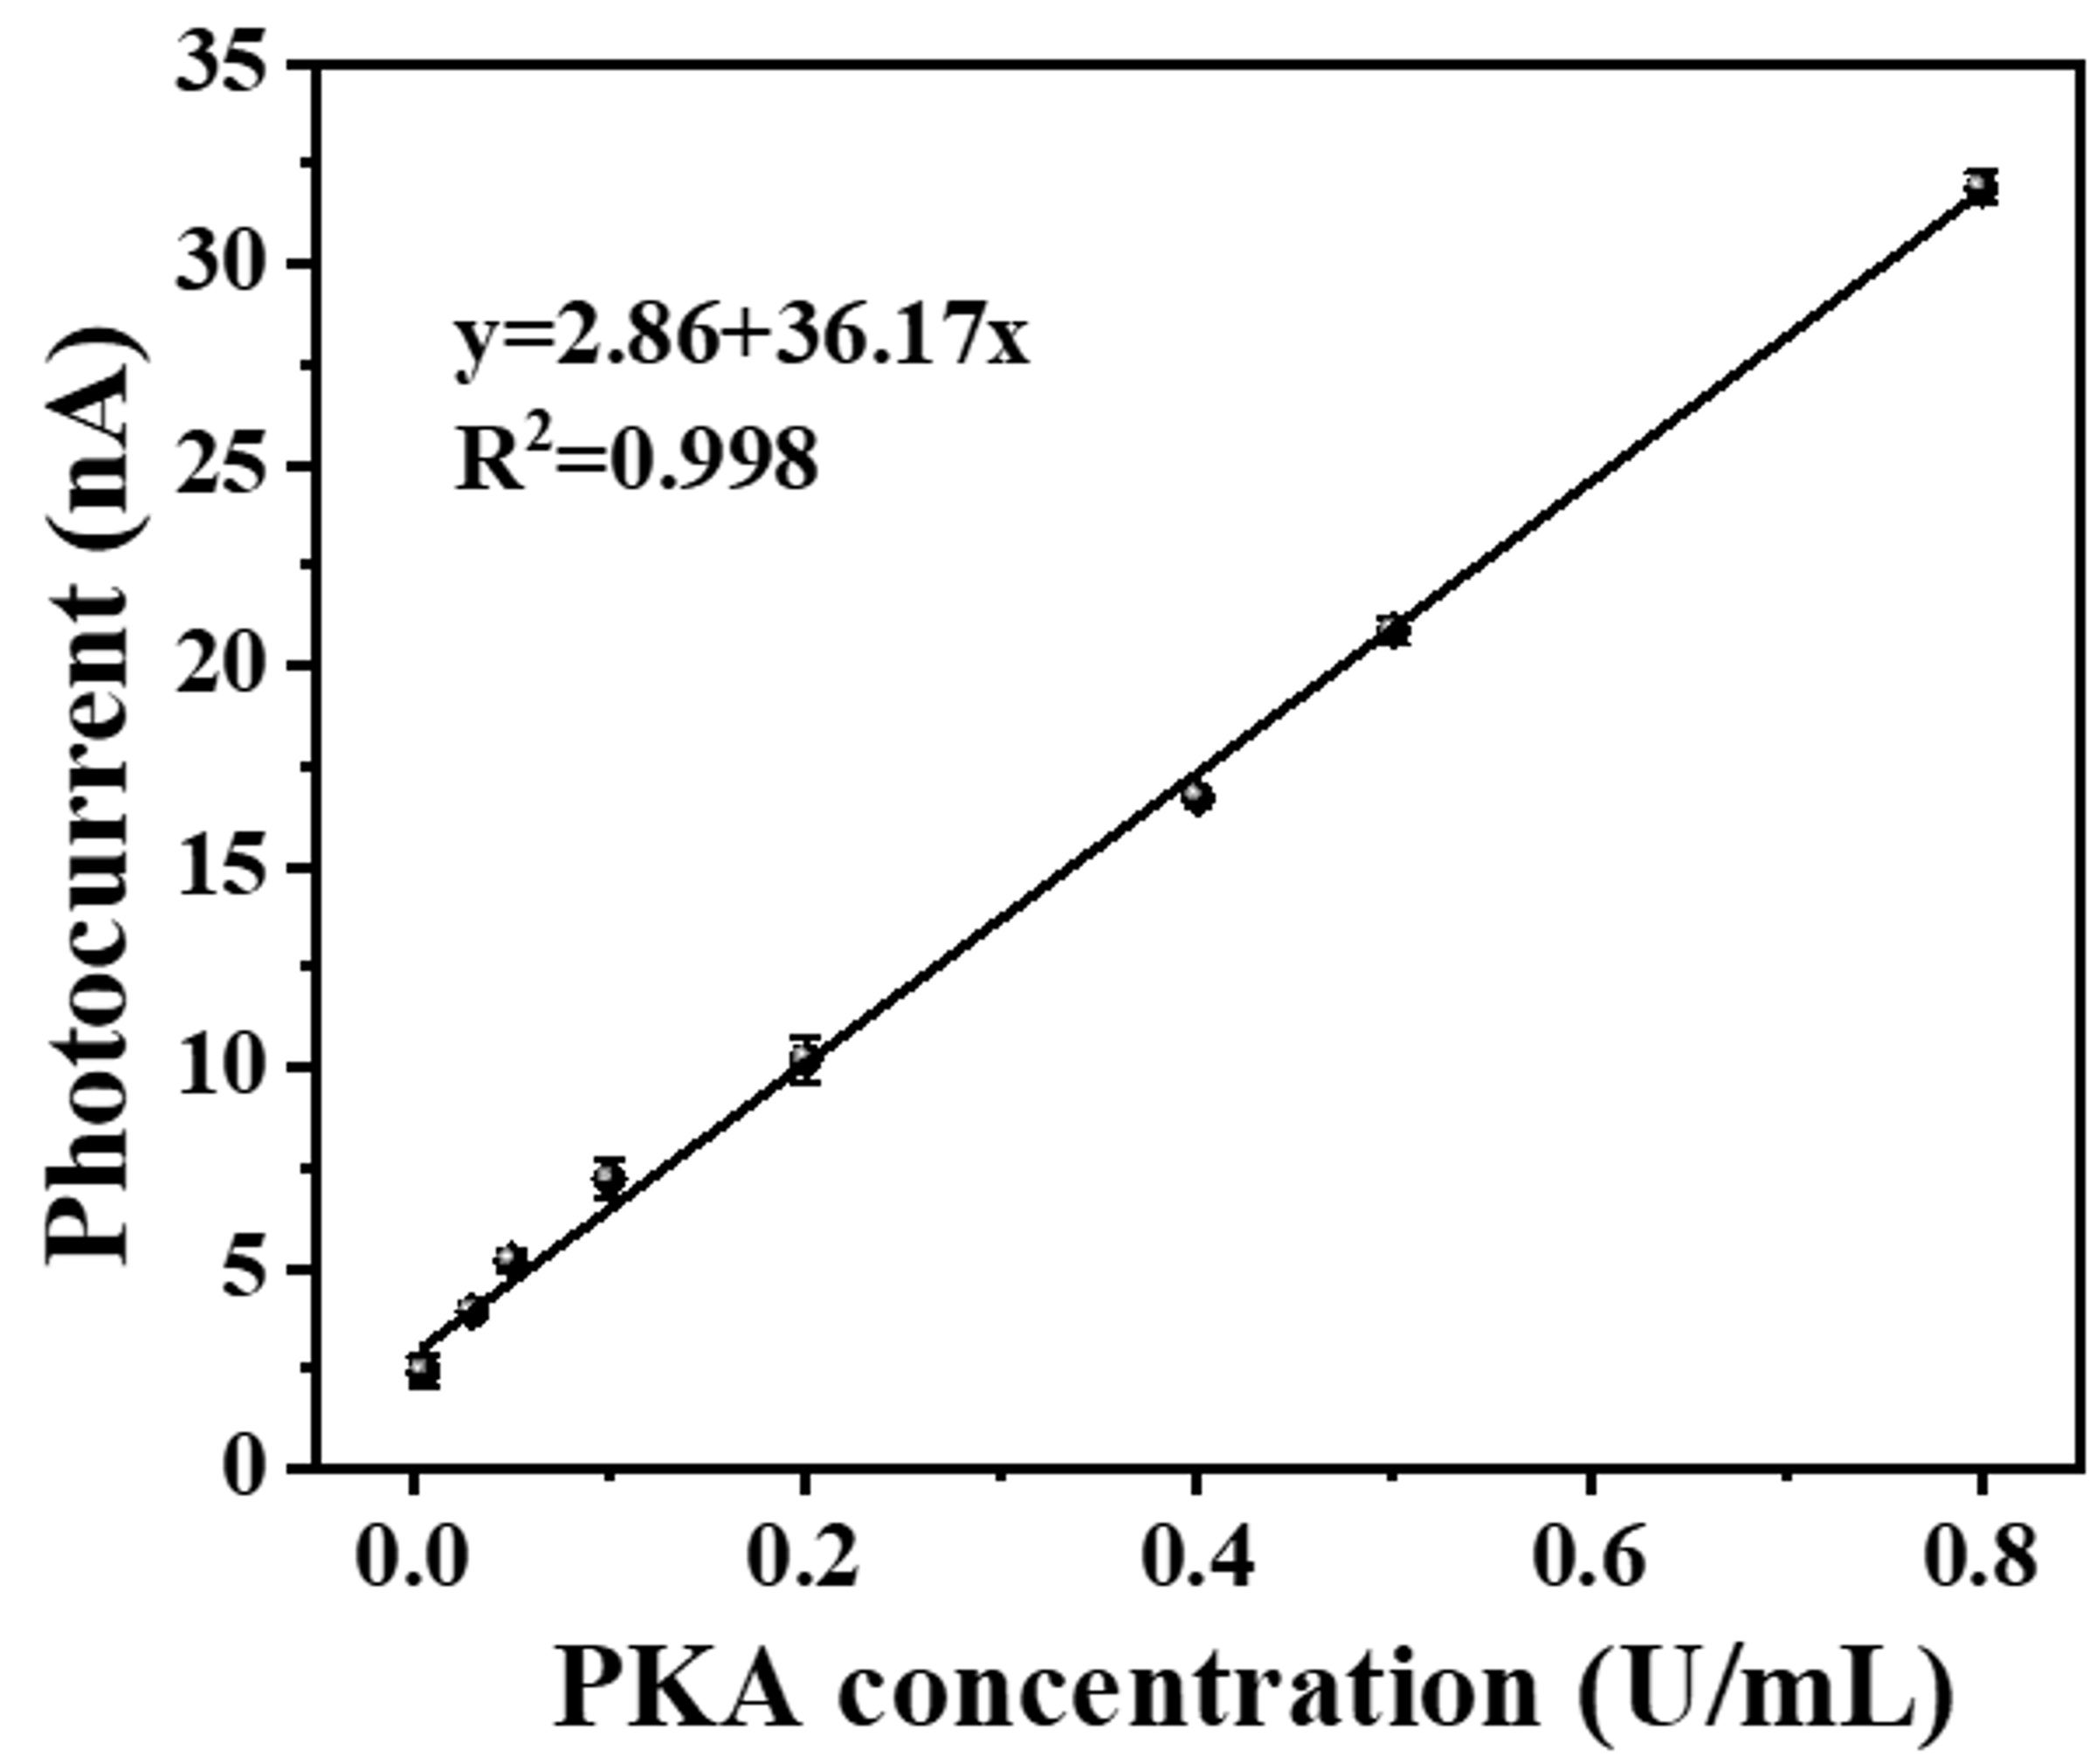


**Fig. S10 The linear relationship between the intensity of the photocurrent changes and the PKA concentration without magnetic field.** The PKA concentration within the range of 0.005 to 1 U/mL had a linear fitting function of y = 2.86 + 36.17x (where y represents photocurrent intensity and x represents PKA concentration), with a correlation coefficient of R2 = 0.998.


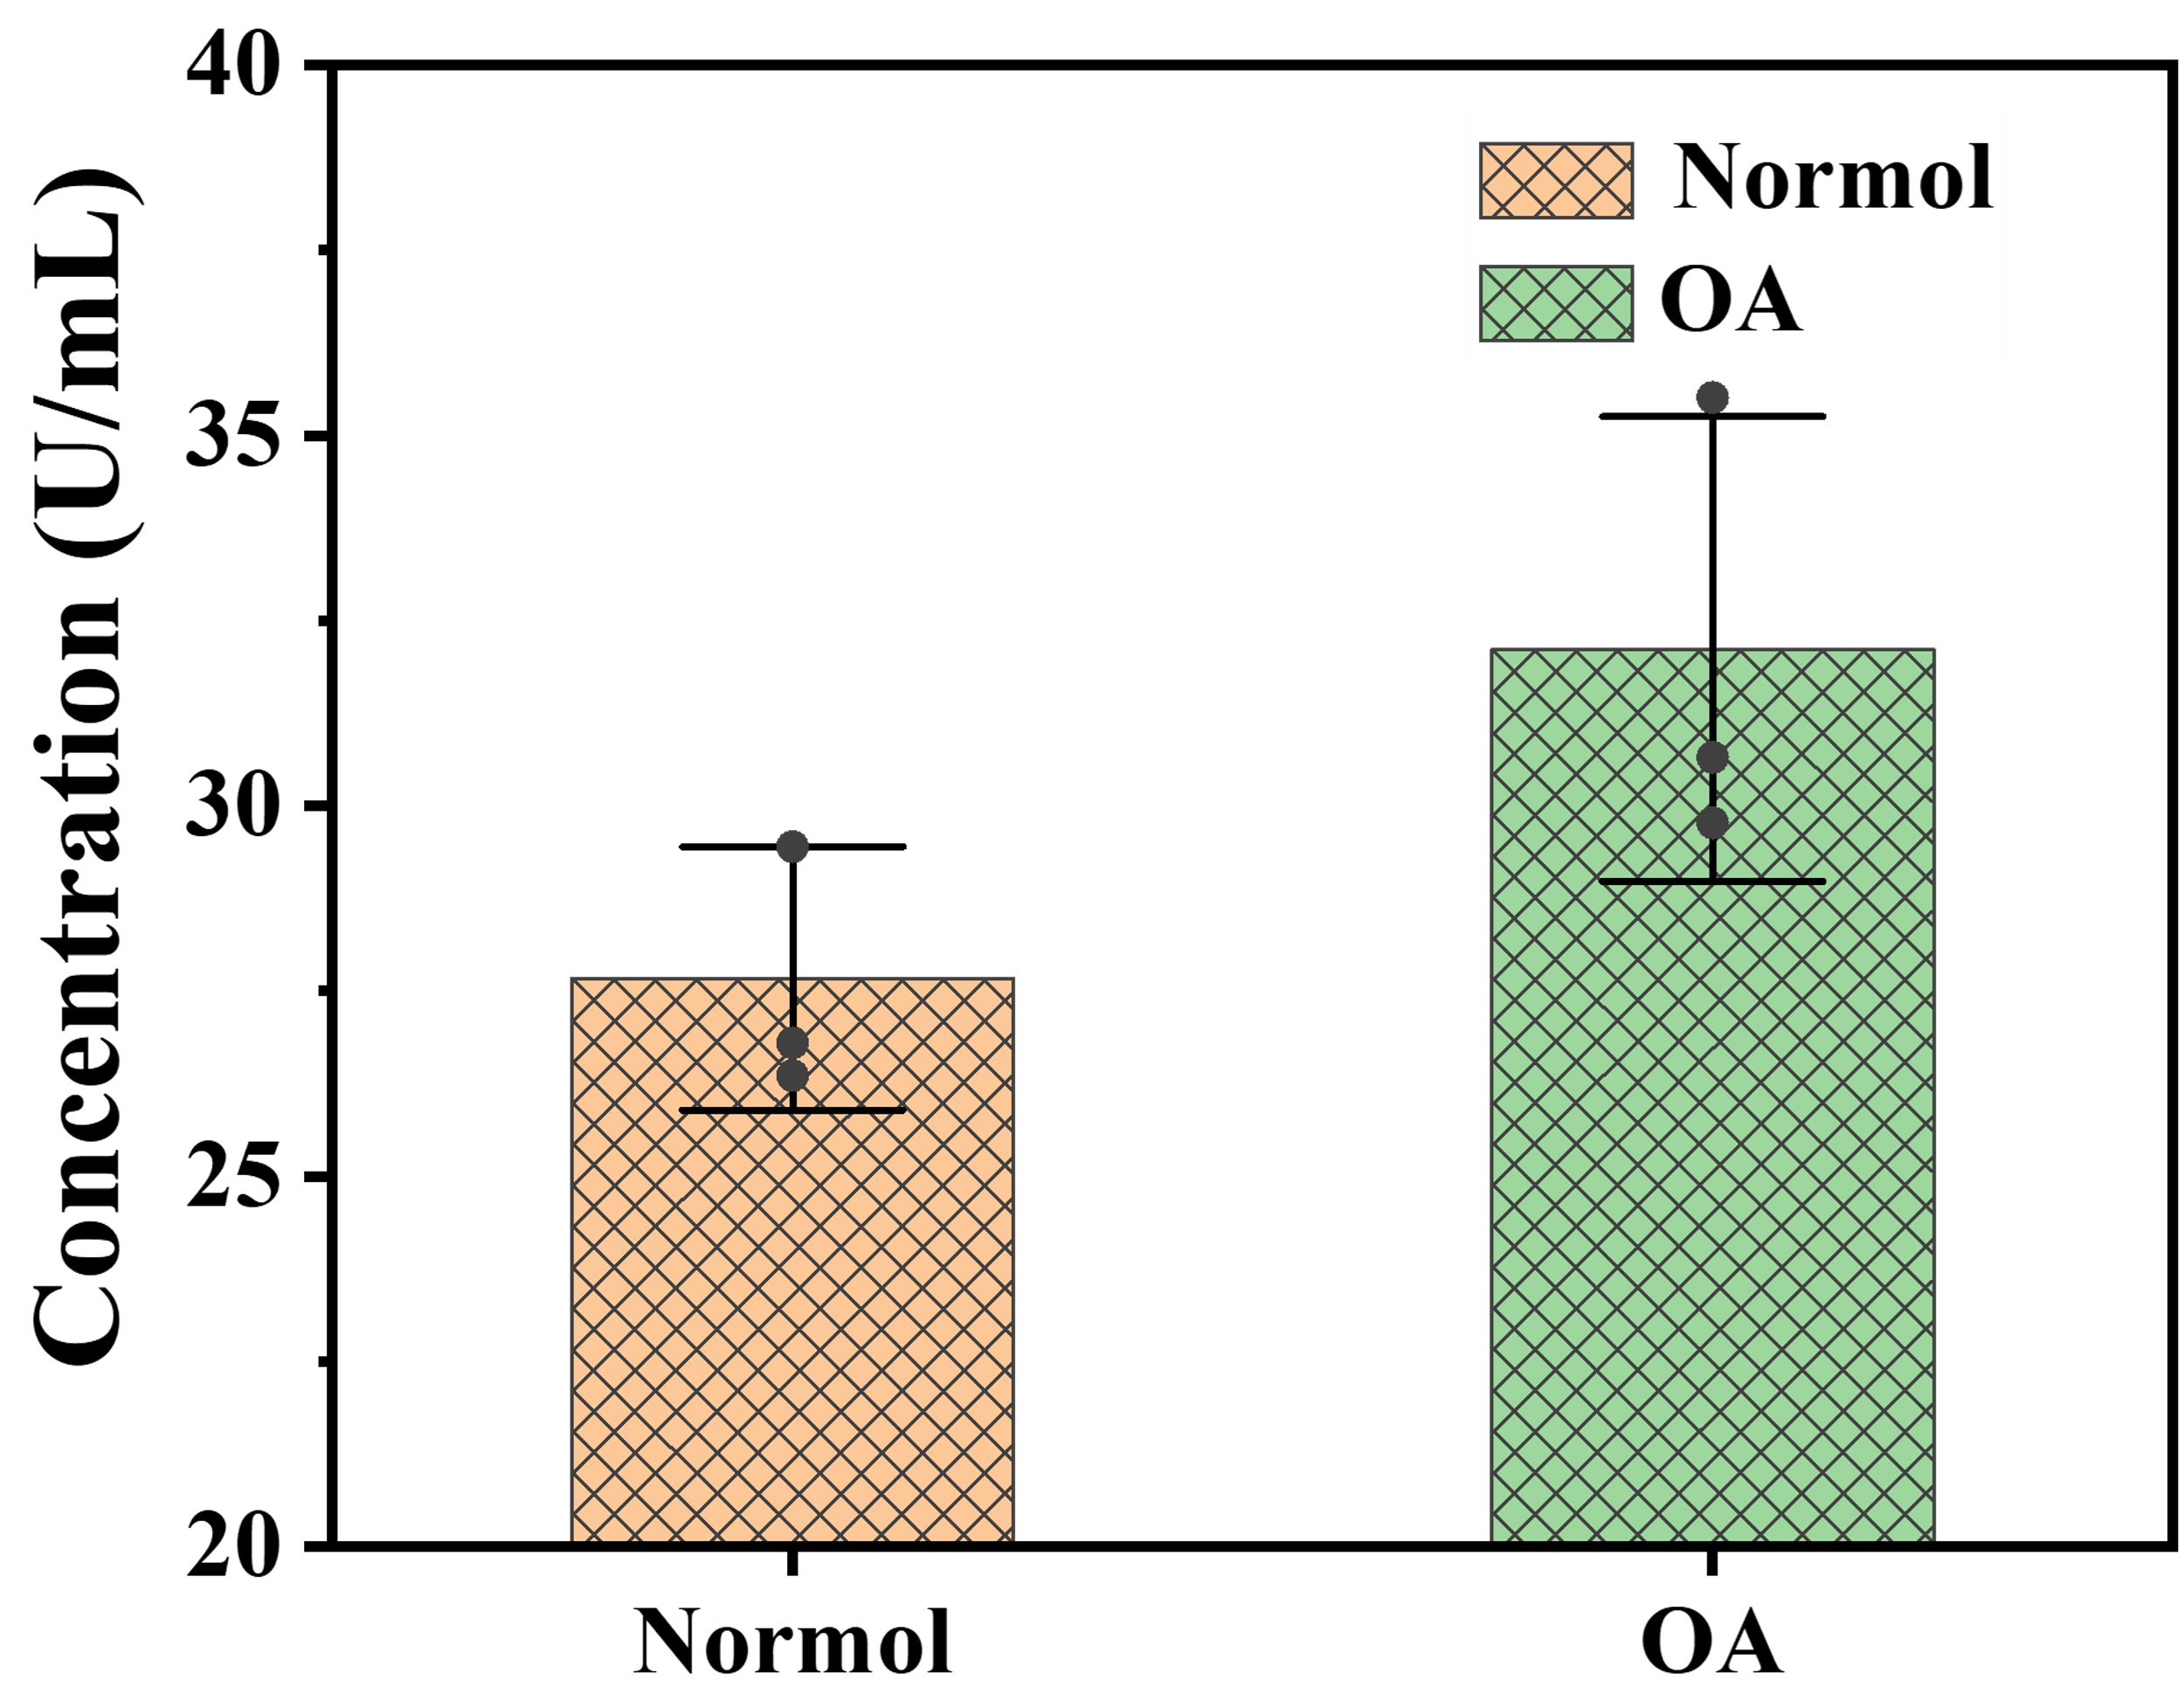


**Fig. S11 The detection of PKA concentration in the synovial fluid (diluted 500 times) of normal individuals and osteoarthritis patients using an Elisa kit.** The results indicated that the biological activity of PKA in the synovial fluid of osteoarthritis patients is significantly increased


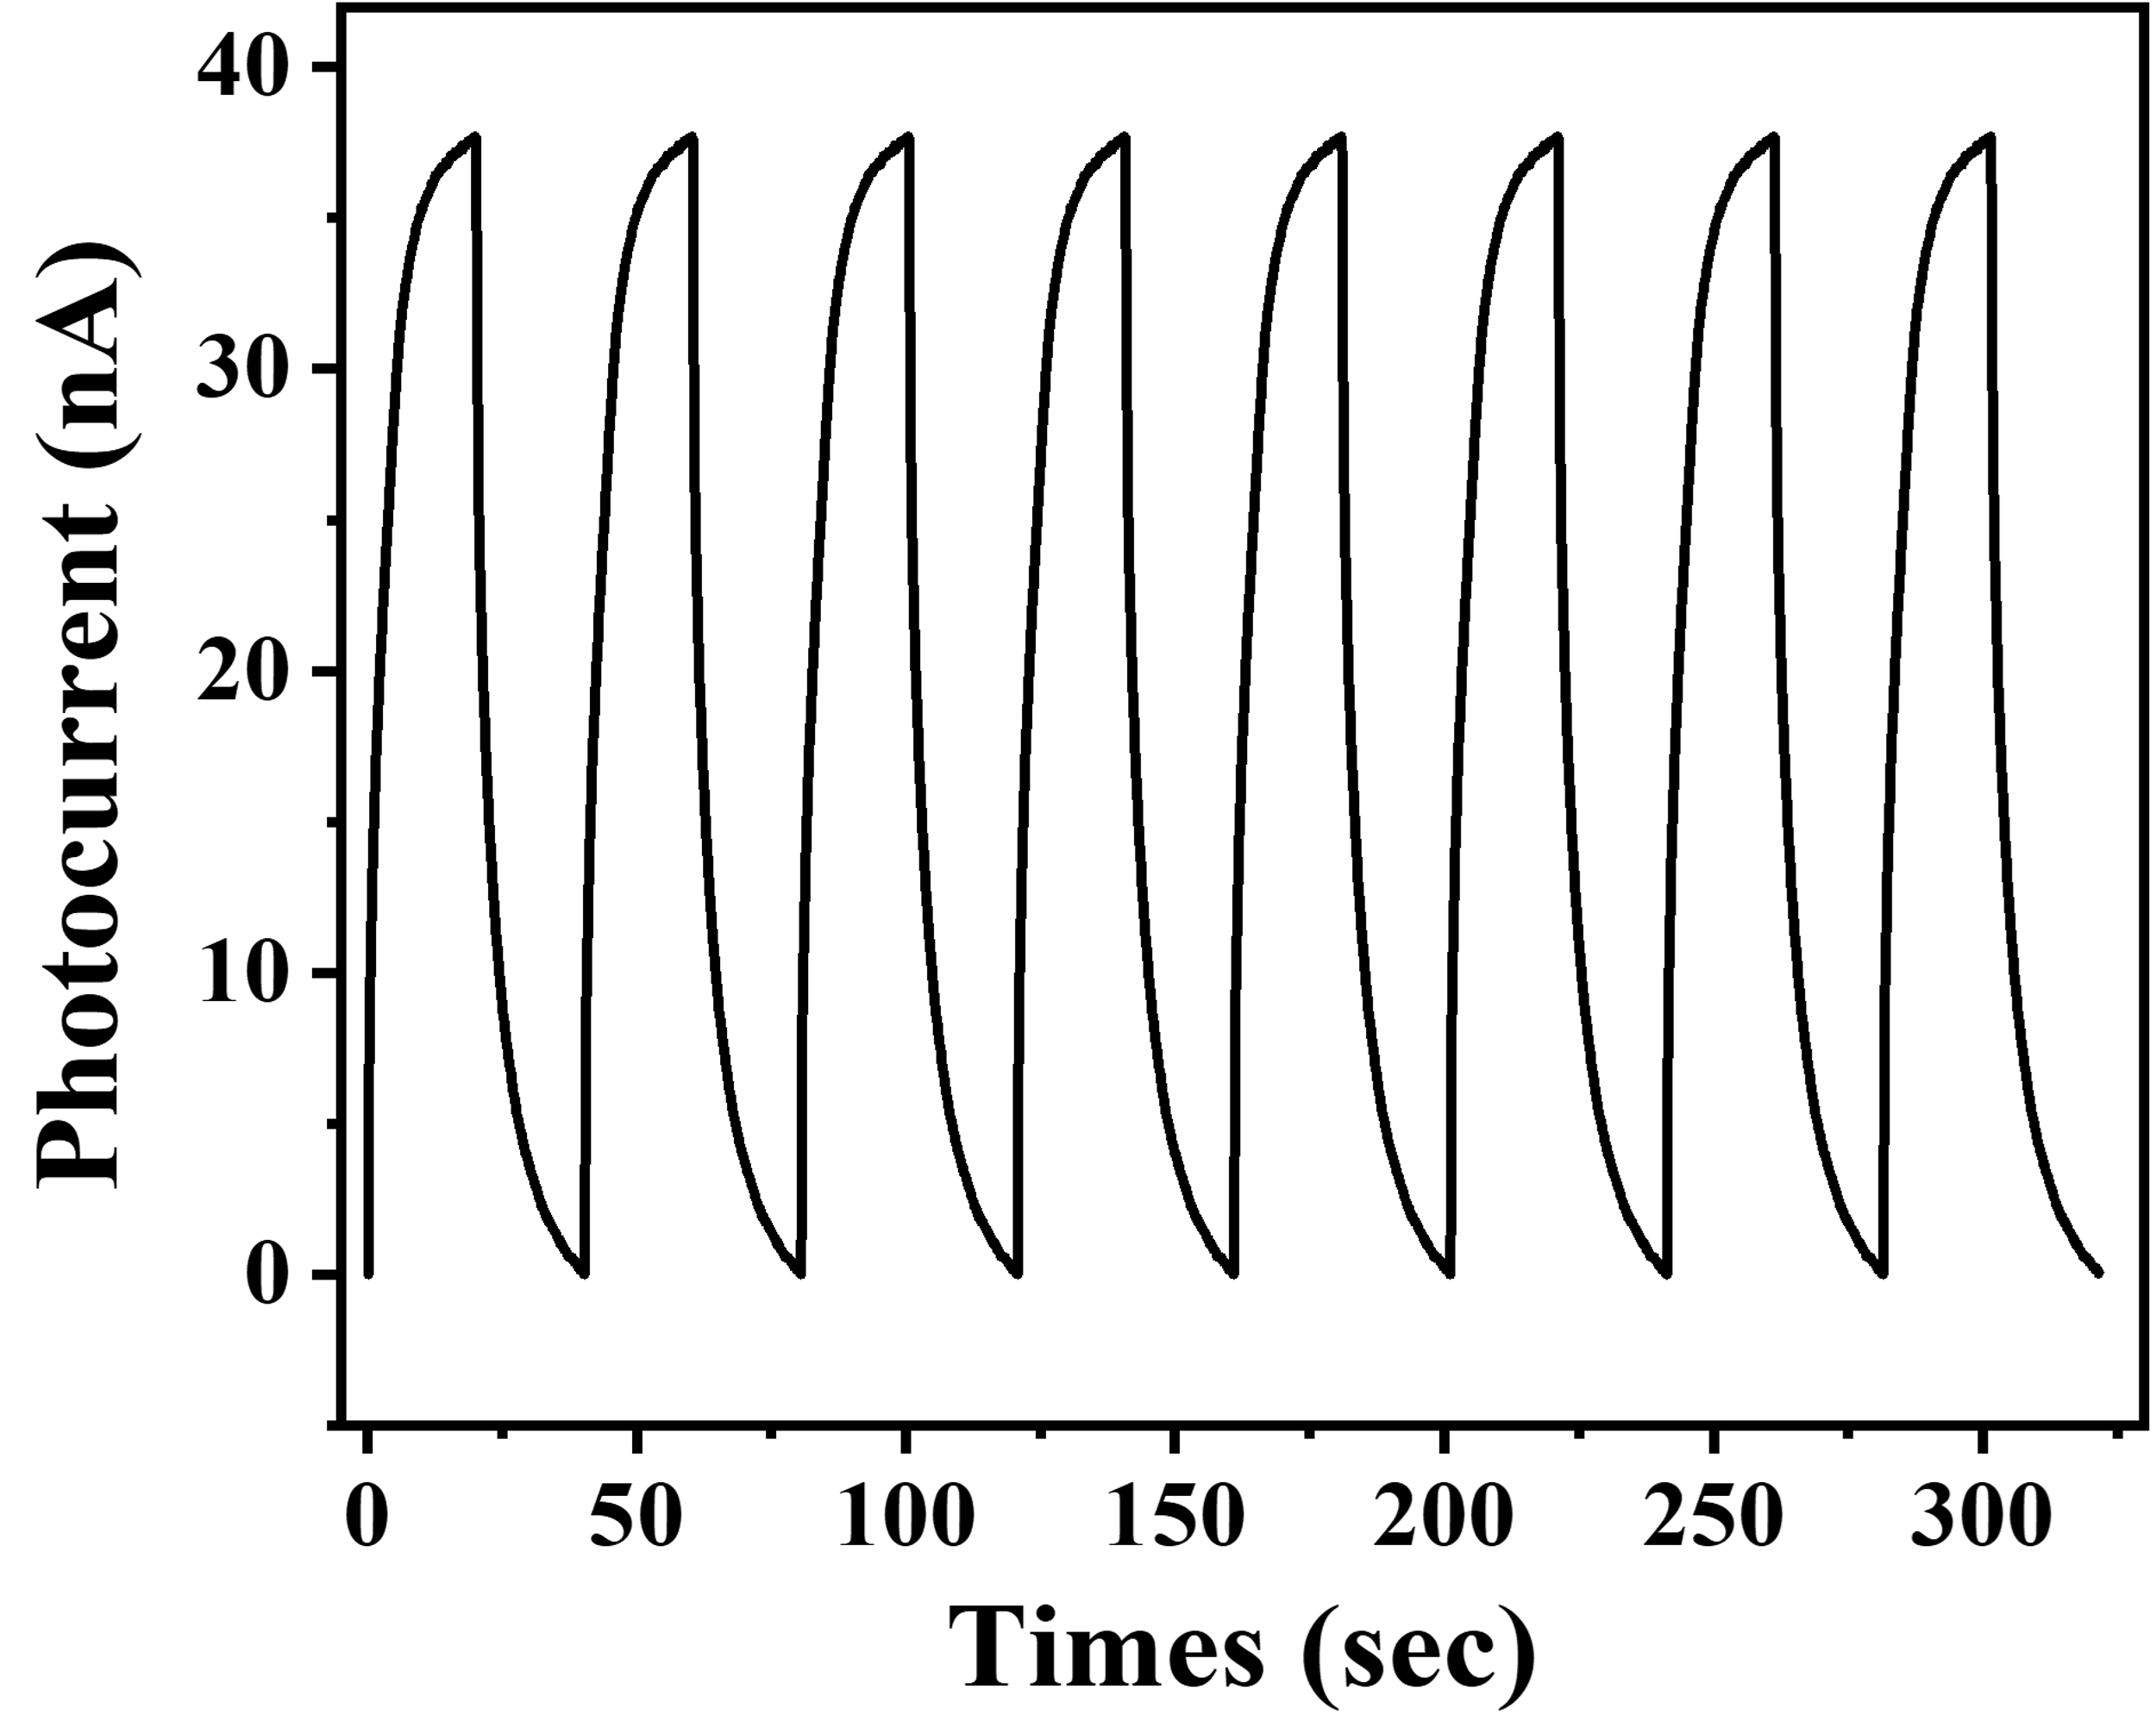


**Fig. S12 8-cycle response curve of the PEC biosensor.** The PKA concentration was 0.5 U/mL. The results showed a low relative standard deviation (RSD) of 0.33%.

**Table 1 Comparison of various methods for PKA activity assay**

| **Method** | **Linear range (U/mL)** | **Detection limit (U/mL)** | **Reference** |
| --- | --- | --- | --- |
| Colorimetry | 0-0.5 | 0.0375 | 4 |
| Fluorescence | 0-1000 | 0.5 | 5 |
| Fluorescence | 0-800 | 0.5 | 6 |
| Electrochemiluminescence | 0.07-32 | 0.07 | 7 |
| Quartz crystal microbalance | 0.64-22.33 | 0.061 | 8 |
| Electrochemistry | 0.05-100 | 0.014 | 9 |
| Electrochemistry | 0.005-50 | 0.002 | 10 |
| PEC method | 0.005-0.0625 | 0.0049 | 11 |
| PEC method | 0.05-100 | 0.048 | 12 |
| PEC method | 0.05-50 | 0.017 | 13 |
| PEC method | 0.001-100 | 0.00035 | 14 |
| PEC method | 0.008-80 | 0.005 | 15 |
| PEC method | 0.005-50 | 0.0049 | 16 |
| PEC method | 0.015-60 | 0.009 | 17 |
| PEC method | 0.004-90 | 0.0026 | 18 |
| This work | 0.005-80 | 0.00027 | without MF |
| This work | 0.005-80 | 0.00016 | With MF |

**References**

1. Li, M. *et al.* Enhanced Salinity Gradient Energy Conversion by Photodegradable MXene/TiO2 Membrane Utilizing Saline Dye Wastewater. *Adv. Funct. Mater.* **35**, 2414342 (2025).

2. Perdew, J. P., Burke, K. & Ernzerhof, M. Generalized Gradient Approximation Made Simple. *Phys. Rev. Lett.* **77**, 3865–3868 (1996).

3. Kresse, G. & Joubert, D. From ultrasoft pseudopotentials to the projector augmented wave method. *Phys. Rev. B* **59**, 1758–1775 (1999).

4. Shen, C. *et al.* Colorimetric and electrochemical determination of the activity of protein kinase based on retarded particle growth due to binding of phosphorylated peptides to DNA – capped silver nanoclusters. *Microchim. Acta* **183**, 2933–2939 (2016).

5. Lu, G. *et al.* Fluorescent detection of protein kinase based on positively charged gold nanoparticles. *Talanta* **128**, 360–365 (2014).

6. Tan, P. *et al.* Fluorescent detection of protein kinase based on zirconium ions immobilized magnetic nanoparticles. *Anal. Chim. Acta* **780**, 89–94 (2013).

7. Xu, S., Liu, Y., Wang, T. & Li, J. Highly Sensitive Electrogenerated Chemiluminescence Biosensor in Profiling Protein Kinase Activity and Inhibition Using Gold Nanoparticle as Signal Transduction Probes. *Anal. Chem.* **82**, 9566–9572 (2010).

8. Xu, X. *et al.* Aptameric Peptide for One-Step Detection of Protein Kinase. *Anal. Chem.* **84**, 4746–4753 (2012).

9. Zhou, Y. *et al.* Electrochemical biosensor for protein kinase A activity assay based on gold nanoparticles-carbon nanospheres, phos-tag-biotin and β-galactosidase. *Biosens. Bioelectron.* **86**, 508–515 (2016).

10. Shen, C. *et al.* A single electrochemical biosensor for detecting the activity and inhibition of both protein kinase and alkaline phosphatase based on phosphate ions induced deposition of redox precipitates. *Biosens. Bioelectron.* **85**, 220–225 (2016).

11. Wang, Z. *et al.* Highly sensitive photoelectrochemical biosensor for kinase activity detection and inhibition based on the surface defect recognition and multiple signal amplification of metal-organic frameworks. *Biosens. Bioelectron.* **97**, 107–114 (2017).

12. Li, X., Zhu, L., Zhou, Y., Yin, H. & Ai, S. Enhanced Photoelectrochemical Method for Sensitive Detection of Protein Kinase A Activity Using TiO2/g-C3N4, PAMAM Dendrimer, and Alkaline Phosphatase. *Anal. Chem.* **89**, 2369–2376 (2017).

13. Sui, C. *et al.* Photoelectrochemical determination of the activity of protein kinase A by using g-C3N4 and CdS quantum dots. *Microchim. Acta* **185**, 541 (2018).

14. Xiao, K. *et al.* A label-free photoelectrochemical biosensor with near-zero-background noise for protein kinase A activity assay based on porous ZrO2/CdS octahedra. *Sens. Actuators B Chem.* **328**, 129096 (2021).

15. Yan, Z., Wang, Z., Miao, Z. & Liu, Y. Dye-Sensitized and Localized Surface Plasmon Resonance Enhanced Visible-Light Photoelectrochemical Biosensors for Highly Sensitive Analysis of Protein Kinase Activity. *Anal. Chem.* **88**, 922–929 (2016).

16. Wang, Z. Highly sensitive photoelectrochemical biosensor for kinase activity detection and inhibition based on the surface defect recognition and multiple signal amplification of metal-organic frameworks. *Biosens. Bioelectron.* **97**, 107–114 (2017).

17. Yan, Z. Sensitive electrogenerated chemiluminescence biosensors for protein kinase activity analysis based on bimetallic catalysis signal amplification and recognition of Au and Pt loaded metal-organic frameworks nanocomposites. *Biosens. Bioelectron.* **109**, 132–138 (2018).

18. Yan, Z. *et al.* Sensitive photoelectrochemical biosensors based on AuNPs/MXenes electrode coupled with light-harvesting UiO-66-NH2 probes for protein kinase detection. *Biosens. Bioelectron. X* **11**, 100204 (2022).
